# Supplementary material for: Predicting Serum Levels of Lithium-Treated Patients: A Supervised Machine Learning Approach
Source: MDPI journal article supplement (doi:10.3390/biomedicines9111558), 2021-10-28
Supplement: s1 [file s1]

# **Supplementary information**

## **Predicting serum levels of lithium-treated patients: A supervised machine learning approach**

**Running Title:** Machine learning to predict lithium concentration

Chih-Wei Hsu, MD<sup>1,2,#</sup>, Shang-Ying Tsai, MD, PhD<sup>3,4</sup>, Liang-Jen Wang, MD, PhD<sup>5</sup>, Chih-Sung Liang, MD<sup>6,7</sup>, Andre F. Carvalho, MD, PhD<sup>8</sup>, Marco Solmi, MD, PhD<sup>9,10,11</sup>, Eduard Vieta, MD, PhD<sup>12</sup>, Pao-Yen Lin, MD, PhD<sup>1,13</sup>, Chien-An Hu, MS<sup>1</sup>, Hung-Yu Kao, PhD<sup>2,#</sup>

<sup>1</sup> Department of Psychiatry, Kaohsiung Chang Gung Memorial Hospital and Chang Gung University College of Medicine, Kaohsiung, Taiwan

<sup>2</sup> Department of Computer Science and Information Engineering, National Cheng Kung University, Tainan, Taiwan

<sup>3</sup> Department of Psychiatry, School of Medicine, College of Medicine, Taipei Medical University, Taipei, Taiwan

<sup>4</sup> Department of Psychiatry and Psychiatric Research Center, Taipei Medical University Hospital, Taipei Medical University, Taipei, Taiwan

<sup>5</sup> Department of Child and Adolescent Psychiatry, Kaohsiung Chang Gung Memorial Hospital and Chang Gung University College of Medicine, Kaohsiung, Taiwan

<sup>6</sup> Department of Psychiatry, Beitou Branch, Tri-Service General Hospital, National Defense Medical Center, Taipei, Taiwan

<sup>7</sup> Department of Psychiatry, National Defense Medical Center, Taipei, Taiwan

<sup>8</sup> IMPACT (Innovation in Mental and Physical Health and Clinical Treatment) Strategic Research Centre, School of Medicine, Barwon Health, Deakin University, Geelong, VIC, Australia

<sup>9</sup> University of Ottawa, Psychiatry Department, Ottawa, Ontario, Canada

<sup>10</sup> The Ottawa Hospital, University of Ottawa, Ottawa, Ontario, Canada

<sup>11</sup> Ottawa Hospital Research Institute (OHRI) Clinical Epidemiology Program University of Ottawa Ottawa Ontario

<sup>12</sup> Bipolar and Depressive Disorders Unit, Hospital Clinic, IDIBAPS, CIBERSAM, University of Barcelona, Barcelona, Catalonia, Spain

<sup>13</sup> Institute for Translational Research in Biomedical Sciences, Kaohsiung Chang Gung Memorial Hospital, Kaohsiung, Taiwan



| Content                                                                                                                                                             | Page  |
|---------------------------------------------------------------------------------------------------------------------------------------------------------------------|-------|
| <b>Appendix 1 (Supplementary Table S1).</b> Detailed drug name with codes and diagnostic codes for mental disorders or medical diseases                             | 3-6   |
| <b>Appendix 2 (Supplementary Table S2).</b> Proportion of laboratory data with no missing test values in inpatient data                                             | 7     |
| <b>Appendix 3 (Supplementary Table S3).</b> Characteristics of lithium-treated patients, comparing inpatient test data and outpatient test data                     | 8     |
| <b>Appendix 4 (Supplementary Table S4).</b> Detail information of binary outcomes in inpatient test data and outpatient test data                                   | 9     |
| <b>Appendix 5 (Supplementary Table S5).</b> Detail information of continuous outcomes in inpatient test data and outpatient test data                               | 10    |
| <b>Appendix 6 (Supplementary Figure S1).</b> LASSO method for selecting the top 10 features in logistic regression, binary outcomes                                 | 11    |
| <b>Appendix 7 (Supplementary Figure S2).</b> Backward stepwise method for selecting the top 10 features in support vector machine, binary outcomes                  | 12    |
| <b>Appendix 8 (Supplementary Figure S3).</b> Shapley additive explanations method for selecting the top 10 features in random forests, binary outcomes              | 13    |
| <b>Appendix 9 (Supplementary Figure S4).</b> Shapley additive explanations method for selecting the top 10 features in extreme gradient boost, binary outcomes      | 14    |
| <b>Appendix 10 (Supplementary Table S6).</b> 114 feature importance ranking results of the 4 different machine learning algorithms in binary outcomes               | 15-18 |
| <b>Appendix 11 (Supplementary Figure S5).</b> LASSO method for selecting the top 10 features in linear regression, continuous outcomes                              | 19    |
| <b>Appendix 12 (Supplementary Figure S6).</b> Backward stepwise method for selecting the top 10 features in support vector machine, continuous outcomes             | 20    |
| <b>Appendix 13 (Supplementary Figure S7).</b> Shapley additive explanations method for selecting the top 10 features in random forests, continuous outcomes         | 21    |
| <b>Appendix 14 (Supplementary Figure S8).</b> Shapley additive explanations method for selecting the top 10 features in extreme gradient boost, continuous outcomes | 22    |
| <b>Appendix 15 (Supplementary Table S7).</b> 114 feature importance ranking results of the 4 different machine learning algorithms in continuous outcomes           | 23-26 |
| <b>Appendix 16 (Supplementary Table S8).</b> Detail information of binary outcomes of logistic regression algorithm under different feature combinations            | 27    |
| <b>Appendix 17 (Supplementary Table S9).</b> Detail information of binary outcomes of support vector machine algorithm under different feature combinations         | 28    |
| <b>Appendix 18 (Supplementary Table S10).</b> Detail information of binary outcomes of random forests algorithm under different feature combinations                | 29    |
| <b>Appendix 19 (Supplementary Table S11).</b> Detail information of binary outcomes of extreme gradient boosting algorithm under different feature combinations     | 30    |
| <b>Appendix 20 (Supplementary Table S12).</b> Detail information of continuous outcomes of linear regression algorithm under different feature combinations         | 31    |
| <b>Appendix 21 (Supplementary Table S13).</b> Detail information of continuous outcomes of support vector machine algorithm under different feature combinations    | 32    |
| <b>Appendix 22 (Supplementary Table S14).</b> Detail information of continuous outcomes of random forests algorithm under different feature combinations            | 33    |
| <b>Appendix 23 (Supplementary Table S15).</b> Detail information of continuous outcomes of extreme gradient boosting algorithm under different feature combinations | 34    |
| <b>Appendix 24 (Supplementary Figure S9).</b> Comparison of accuracy performance between the primary model and different new models under different algorithms.     | 35    |



**Appendix 1 (Supplementary Table S1).** Detailed drug name with codes and diagnostic codes for mental disorders or medical diseases

| Drug name                                   | Detail drugs and their Anatomical Therapeutic Chemical (ATC) codes                                                                                                                                                                              |
|---------------------------------------------|-------------------------------------------------------------------------------------------------------------------------------------------------------------------------------------------------------------------------------------------------|
| <b>Concomitant psychotropic medications</b> |                                                                                                                                                                                                                                                 |
| <b>Mood stabilizers</b>                     |                                                                                                                                                                                                                                                 |
| Lithium                                     | Lithium (N05AN01)                                                                                                                                                                                                                               |
| Carbamazepine                               | Carbamazepine (N03AF01)                                                                                                                                                                                                                         |
| Lamotrigine                                 | Lamotrigine (N03AX09)                                                                                                                                                                                                                           |
| Valproic acid                               | Valproic acid (N03AG01)                                                                                                                                                                                                                         |
| Topiramate                                  | Topiramate (N03AX11)                                                                                                                                                                                                                            |
| <b>Antidepressants</b>                      |                                                                                                                                                                                                                                                 |
| Selective serotonin reuptake inhibitor      | Citalopram (N06AB04), Escitalopram (N06AB10), Fluoxetine (N06AB03), Paroxetine (N06AB05), Sertraline (N06AN06)                                                                                                                                  |
| Serotonin norepinephrine reuptake inhibitor | Duloxetine (N06AX21), Milnacipran (N06AX17), Venlafaxine (N06AX16)                                                                                                                                                                              |
| Trazodone                                   | Trazodone (N06AX05)                                                                                                                                                                                                                             |
| Mirtazapine                                 | Mirtazapine (N06AX11)                                                                                                                                                                                                                           |
| Bupropion                                   | Bupropion (N06AX12)                                                                                                                                                                                                                             |
| Agomelatine                                 | Agomelatine (N06AX22)                                                                                                                                                                                                                           |
| <b>Antipsychotics</b>                       |                                                                                                                                                                                                                                                 |
| Typical antipsychotics                      | Chlorpromazine (N05AA01), Haloperidol (N05AD01), Flupentixol (N05AF01), Fluphenazine (N05AB02), Loxapine (N05AH01), Prochlorperazine (N05AB04), Thioridazine (N05AC02), Zuclopenthixol (N05AF05)                                                |
| The benzamides                              | Amisulpride (N05AL05), Sulpiride (N05AL01)                                                                                                                                                                                                      |
| The -dones                                  | Paliperidone (N05AX13), Risperidone (N05AX08), Ziprasidone (N05AE04)                                                                                                                                                                            |
| The -pines                                  | Clozapine (N05AH02), Olanzapine (N05AH03), Quetiapine (N05AH04), Zotepine (N05AX11)                                                                                                                                                             |
| Aripiprazole                                | Aripiprazole (N05AX12)                                                                                                                                                                                                                          |
| <b>Anxiolytics, sedatives, or hypnotics</b> |                                                                                                                                                                                                                                                 |
| Benzodiazepines                             | Alprazolam (N05BA12), Chlordiazepoxide (N05BA02), Clobazam (N05BA09), Clonazepam (N05AE01), Diazepam (N05BA01), Estazolam (N05CD04), Fludiazepam (N05BA17), Flurazepam (N05CD01), Lorazepam (N05BA06), Midazolam (N05CD08), Triazolam (N05CD05) |
| Non-benzodiazepines                         | Zaleplon (N05CF03), Zolpidem (N05CF02)                                                                                                                                                                                                          |
| <b>Antidementia</b>                         |                                                                                                                                                                                                                                                 |
| Acetylcholinesterase inhibitors             | Donepezil (N06DA02), Galantamine (N06DA04), Rivastigmine (N06DA03)                                                                                                                                                                              |
| <b>Concomitant medications (other)</b>      |                                                                                                                                                                                                                                                 |
| <b>Lipid-lowering agents</b>                |                                                                                                                                                                                                                                                 |
| Statins                                     | Statins (C10AA, C10BA)                                                                                                                                                                                                                          |
| Fibrates                                    | Fibrates (C10AB)                                                                                                                                                                                                                                |
| <b>Antidiabetic agents</b>                  |                                                                                                                                                                                                                                                 |
| Insulins                                    | Insulins (A10A)                                                                                                                                                                                                                                 |
| Metformin                                   | Metformin (A10BA02, A10BD)                                                                                                                                                                                                                      |
| Sodium-glucose cotransporter 2 inhibitors   | Sodium-glucose cotransporter 2 inhibitors (A10BK)                                                                                                                                                                                               |
| Dipeptidyl peptidase 4 inhibitors           | Dipeptidyl peptidase 4 inhibitors (A10BH)                                                                                                                                                                                                       |
| Sulfonylureas                               | Sulfonylureas (A10BB, A10BD02)                                                                                                                                                                                                                  |
| Acarbose                                    | Acarbose (A10BF)                                                                                                                                                                                                                                |



|                                                      |                                                                                                                                                                                                                                                                                                                                                                                                                                                                                                                                                                      |
|------------------------------------------------------|----------------------------------------------------------------------------------------------------------------------------------------------------------------------------------------------------------------------------------------------------------------------------------------------------------------------------------------------------------------------------------------------------------------------------------------------------------------------------------------------------------------------------------------------------------------------|
| Thiazolidinediones                                   | Thiazolidinediones (A10BG)                                                                                                                                                                                                                                                                                                                                                                                                                                                                                                                                           |
| Meglitinides                                         | Meglitinides (A10BX)                                                                                                                                                                                                                                                                                                                                                                                                                                                                                                                                                 |
| <b>Anti-hypertensive medications</b>                 |                                                                                                                                                                                                                                                                                                                                                                                                                                                                                                                                                                      |
| Angiotensin converting enzyme inhibitors             | Angiotensin converting enzyme inhibitors (C09A, C09B)                                                                                                                                                                                                                                                                                                                                                                                                                                                                                                                |
| Angiotensin receptor blockers                        | Angiotensin receptor blockers (C09C, C09D)                                                                                                                                                                                                                                                                                                                                                                                                                                                                                                                           |
| Diuretics                                            | Diuretics (C03)                                                                                                                                                                                                                                                                                                                                                                                                                                                                                                                                                      |
| Beta blockers                                        | Beta blockers (C07)                                                                                                                                                                                                                                                                                                                                                                                                                                                                                                                                                  |
| Calcium channel blockers                             | Calcium channel blockers (C08)                                                                                                                                                                                                                                                                                                                                                                                                                                                                                                                                       |
| <b>Antiplatelet drugs</b>                            |                                                                                                                                                                                                                                                                                                                                                                                                                                                                                                                                                                      |
| Aspirin                                              | Aspirin (B01AC06)                                                                                                                                                                                                                                                                                                                                                                                                                                                                                                                                                    |
| Others                                               | Others (B01AC07, B01AC22, B01AC30, B01AC91)                                                                                                                                                                                                                                                                                                                                                                                                                                                                                                                          |
| <b>Antiarrhythmic drugs</b>                          |                                                                                                                                                                                                                                                                                                                                                                                                                                                                                                                                                                      |
| Amiodarone                                           | Amiodarone (C01BD01, C01BD07)                                                                                                                                                                                                                                                                                                                                                                                                                                                                                                                                        |
| <b>Non-steroidal anti-inflammatory drugs</b>         | Non-steroidal anti-inflammatory drugs (M01AA, M01AX, M01AB, M01AC, M01AE, M01AG, M01AH)                                                                                                                                                                                                                                                                                                                                                                                                                                                                              |
| <b>Antacids</b>                                      | Antacids (A02BA, A02BC)                                                                                                                                                                                                                                                                                                                                                                                                                                                                                                                                              |
| <b>Mental disorders / Medical diseases</b>           | <b>The International Classification of Diseases 9<sup>th</sup> (ICD-9) or 10<sup>th</sup> (ICD-10)</b>                                                                                                                                                                                                                                                                                                                                                                                                                                                               |
| <b>Mental disorders</b>                              |                                                                                                                                                                                                                                                                                                                                                                                                                                                                                                                                                                      |
| Neurodevelopmental disorders                         | 299, 307.2, 307.3, 307.9, 314, 315, 317, 318, 319, F44.4, F63.3, F70, F71, F72, F73, F78, F79, F80.0, F80.1, F80.2, F80.4, F80.89, F80.9, F81, F82, F84.0, F84.3, F84.5, F84.8, F84.9, F88, F89, F90.1, F90.2, F90.8, F90.9, F95, F98.4, F98.8, H93.25, R41.840, R41.841, R41.843, R41.844, R45.1, R45.81, R45.82, R48.0                                                                                                                                                                                                                                             |
| Disruptive, impulse-control, and conduct disorders   | 312.32, 312.33, 312.34, 312.8, 312.9, 313.81, F63.1, F63.2, F63.81, F9                                                                                                                                                                                                                                                                                                                                                                                                                                                                                               |
| Schizophrenia spectrum and other psychotic disorders | 295, 297.0, 297.1, 297.2, 298.3, 298.4, 298.8, 298.9, F20, F22, F23, F25, F28, F2                                                                                                                                                                                                                                                                                                                                                                                                                                                                                    |
| Bipolar and related disorders                        | 296.0, 296.1, 296.4, 296.5, 296.6, 296.7, 296.80, 296.89, 301.13, F30.1, F30.2, F30.3, F30.4, F30.9, F31, F34                                                                                                                                                                                                                                                                                                                                                                                                                                                        |
| Depressive disorders                                 | 296.2, 296.3, 296.99, 300.4, 311, 625.4, F32.0, F32.1, F32.2, F32.3, F32.4, F32.5, F32.9, F33, F34.1, F34.8, F34.9, G43.82, G43.83, N94                                                                                                                                                                                                                                                                                                                                                                                                                              |
| Anxiety disorders                                    | 300.00, 300.01, 300.02, 300.09, 300.2, 309.21, 313.23, F40, F41, F93.0, F94                                                                                                                                                                                                                                                                                                                                                                                                                                                                                          |
| Obsessive-compulsive and related disorders           | 300.3, 300.7, 312.39, 698.4, F42, F45.2, F63.3, F63.89, L98                                                                                                                                                                                                                                                                                                                                                                                                                                                                                                          |
| Somatic symptom and related disorders                | 300.11, 300.19, 300.7, 300.8, 316, F44.2, F44.4, F44.5, F44.6, F44.7, F45.0, F45.1, F45.2, F45.8, F45.9, F48.8, F54, F68                                                                                                                                                                                                                                                                                                                                                                                                                                             |
| Elimination disorders                                | 307.6, 307.7, 787.60, 788.30, 788.39, F98.0, F98.1, N39.490, N39.498, R15, R32, R39.8                                                                                                                                                                                                                                                                                                                                                                                                                                                                                |
| Sleep-wake disorders                                 | 307.4, 327, 347, 780.5, F51, G47.0, G47.1, G47.2, G47.3, G47.4, G47.5, G47.61, G47.69, G47.8, G47                                                                                                                                                                                                                                                                                                                                                                                                                                                                    |
| Sexual dysfunctions                                  | 302.7, F52.0, F52.1, F52.2, F52.3, F52.4, F52.6, F52.8, F52.9, R3                                                                                                                                                                                                                                                                                                                                                                                                                                                                                                    |
| Substance-related and addictive disorders            | 291.4, 291.81, 292.0, 292.2, 303, 304, 305, 312.31, F10.10, F10.120, F10.129, F10.20, F10.21, F10.220, F10.229, F10.230, F10.232, F10.239, F10.920, F10.929, F11.10, F11.120, F11.129, F11.20, F11.21, F11.220, F11.229, F11.23, F11.90, F11.920, F11.929, F11.93, F12.10, F12.120, F12.129, F12.20, F12.21, F12.220, F12.229, F12.90, F12.920, F12.929, F13.10, F13.120, F13.129, F13.20, F13.21, F13.220, F13.229, F13.23, F13.90, F13.920, F13.929, F13.93, F14.10, F14.120, F14.129, F14.20, F14.21, F14.220, F14.229, F14.23, F14.90, F14.920, F14.929, F15.10, |



|                                                        |                                                                                                                                                                                                                                                                                                                                                                                                                                                                                                      |
|--------------------------------------------------------|------------------------------------------------------------------------------------------------------------------------------------------------------------------------------------------------------------------------------------------------------------------------------------------------------------------------------------------------------------------------------------------------------------------------------------------------------------------------------------------------------|
|                                                        | F15.120, F15.129, F15.20, F15.21, F15.220, F15.229, F15.23, F15.90, F15.920, F15.929, F15.93, F16.10, F16.120, F16.129, F16.20, F16.21, F16.220, F16.229, F16.90, F16.920, F16.929, F17.200, F17.201, F17.203, F17.210, F17.211, F17.213, F17.220, F17.221, F17.223, F17.290, F17.291, F17.293, F18.10, F18.120, F18.129, F18.20, F18.21, F18.220, F18.229, F18.90, F18.920, F18.929, F19.10, F19.120, F19.129, F19.20, F19.21, F19.220, F19.229, F19.23, F19.90, F19.920, F19.929, F19.93, F55, F63 |
| Neurocognitive disorders<br>(Except vascular dementia) | F02, F05, G30, G31, G31.0, G31.1, G93.7, 290.1, 290.2, 290.3, 294.1, 294.2, 331.0, 331.1, 331.2, 331.8, 331.9, F03.90, G31.83, G31.85, G31.89, F03.90, G31.83, G31.85, G31.8                                                                                                                                                                                                                                                                                                                         |
| Personality disorders                                  | 301.0, 301.20, 301.22, 301.4, 301.50, 301.6, 301.7, 301.81, 301.82, 301.83, 301.89, 301.9, F21, F60, F6                                                                                                                                                                                                                                                                                                                                                                                              |
| Trauma- and stressor-related disorders                 | 308.3, 309.0, 309.24, 309.28, 309.3, 309.4, 309.81, 309.89, 309.9, 313.89, F43.0, F43.1, F43.21, F43.22, F43.23, F43.24, F43.25, F43.8, F43.9, F93.8, F94.1, F94.2, F94.9, F98                                                                                                                                                                                                                                                                                                                       |
| Dissociative disorders                                 | 300.12, 300.13, 300.14, 300.15, 300.6, F44.0, F44.1, F44.81, F44.9, F48                                                                                                                                                                                                                                                                                                                                                                                                                              |
| Feeding and eating disorders                           | 307.1, 307.5, F50, F98.2, F98                                                                                                                                                                                                                                                                                                                                                                                                                                                                        |
| Gender dysphoria                                       | 302.6, 302.85, F64.1, F64.2, F64.8, F64                                                                                                                                                                                                                                                                                                                                                                                                                                                              |
| Paraphilic disorders                                   | 302.2, 302.3, 302.4, 302.81, 302.82, 302.83, 302.84, 302.89, 302.9, F65, F6                                                                                                                                                                                                                                                                                                                                                                                                                          |
| <b>Medical diseases</b>                                |                                                                                                                                                                                                                                                                                                                                                                                                                                                                                                      |
| Myocardial infarct                                     | 410, 412, I21, I22, I25                                                                                                                                                                                                                                                                                                                                                                                                                                                                              |
| Congestive heart failure                               | 398.91, 402.01, 402.11, 402.91, 404.01, 404.03, 404.11, 404.13, 404.91, 404.93, 425.4, 425.5, 425.6, 425.7, 425.8, 425.9, 428, I5                                                                                                                                                                                                                                                                                                                                                                    |
| Peripheral vascular diseases                           | 047.1, 093.0, 437.3, 440, 441, 443.1, 443.2, 443.3, 443.4, 443.5, 443.6, 443.7, 443.8, 443.9, 557.1, 557.9, I71, I73.9, I79.0, R02, Z95.8, Z95                                                                                                                                                                                                                                                                                                                                                       |
| Cerebrovascular diseases                               | 362.34, 430, 431, 432, 433, 434, 435, 436, 437, 438, G45.0, G45.1, G45.2, G45.4, G45.8, G45.9, G46, I60, I61, I62, I63, I64, I65, I66, I67.0, I67.1, I67.2, I67.4, I67.5, I67.6, I67.7, I67.8, I67.9, I68.1, I68.2, I68.8, I6                                                                                                                                                                                                                                                                        |
| Vascular dementia                                      | 290.4, F01                                                                                                                                                                                                                                                                                                                                                                                                                                                                                           |
| Hemiplegia                                             | 334.1, 342, 343, 344.0, 344.1, 344.2, 344.3, 344.4, 344.5, 344.6, 344.9, G04.1, G81, G82.0, G82.1, G82                                                                                                                                                                                                                                                                                                                                                                                               |
| Chronic pulmonary diseases                             | 416.8, 416.9, 490, 491, 492, 493, 494, 495, 496, 497, 498, 499, 500, 501, 502, 503, 504, 505, 506.4, 508.1, 508.8, J40, J41, J42, J43, J44, J45, J46, J47, J60, J61, J62, J63, J64, J65, J66, J6                                                                                                                                                                                                                                                                                                     |
| Peptic ulcer diseases                                  | 531, 532, 533, 534, K25, K26, K27, K28                                                                                                                                                                                                                                                                                                                                                                                                                                                               |
| Liver diseases without sequelae                        | 070.22, 070.23, 070.32, 070.33, 070.44, 070.54, 070.6, 070.9, 570, 571, 573.3, 573.4, 573.8, K70.2, K70.3, K71.7, K73, K74.0, K74.2, K74.3, K74.4, K74.5, K74.6, V42                                                                                                                                                                                                                                                                                                                                 |
| Liver diseases with sequelae                           | 456.0, 456.1, 456.2, 572.2, 572.3, 572.4, 572.5, 572.6, 572.7, 572.8, K72.1, K72.9, K76.6, K76                                                                                                                                                                                                                                                                                                                                                                                                       |
| Renal diseases                                         | 403.01, 403.11, 403.91, 404.02, 404.03, 404.12, 404.13, 404.92, 404.93, 582, 583.0, 583.1, 583.2, 583.3, 583.4, 583.5, 583.6, 583.7, 585, 586, 588.0, N01, N03, N05.2, N05.3, N05.4, N05.5, N05.6, N07.2, N07.3, N07.4, N18, N19, N25, V42.0, V45.1, V5                                                                                                                                                                                                                                              |
| Connective tissue diseases                             | 446.5, 710.0, 710.1, 710.2, 710.3, 710.4, 725, M05.0, M05.1, M05.2, M05.3, M05.8, M05.9, M06.0, M06.3, M06.9, M32, M33.2, M34, M35                                                                                                                                                                                                                                                                                                                                                                   |
| Any cancer                                             | 140, 141, 142, 143, 144, 145, 146, 147, 148, 149, 150, 151, 152, 153, 154, 155, 156, 157, 158, 159, 160, 161, 162, 163, 164, 165, 166, 167, 168, 169, 170, 171, 172, 174, 175, 176, 177, 178, 179, 180, 181, 182,                                                                                                                                                                                                                                                                                    |



|                                            |                                                                                                                                                                                                                                                                                                                                                                                                                                                                                                                                                                                                                                                                                                 |
|--------------------------------------------|-------------------------------------------------------------------------------------------------------------------------------------------------------------------------------------------------------------------------------------------------------------------------------------------------------------------------------------------------------------------------------------------------------------------------------------------------------------------------------------------------------------------------------------------------------------------------------------------------------------------------------------------------------------------------------------------------|
|                                            | 183, 184, 185, 186, 187, 188, 189, 190, 191, 192, 193, 194, 195, 195.0, 195.1, 195.2, 195.3, 195.4, 195.5, 195.6, 195.7, 195.8, 200, 201, 202, 203, 204, 205, 206, 207, 208, 238.6, C0, C1, C2, C3, C40, C41, C43, C45, C46, C47, C48, C49, C5, C6, C70, C71, C72, C73, C74, C75, C76, C80, C81, C82, C83, C84, C85, C88.3, C88.7, C88.9, C90.0, C90.1, C91, C92, C93, C94.0, C94.1, C94.2, C94.3, C94.51, C94.7, C95, C9                                                                                                                                                                                                                                                                       |
| Metastatic solid tumor                     | 196, 197, 198, 199, C77, C78, C79, C8                                                                                                                                                                                                                                                                                                                                                                                                                                                                                                                                                                                                                                                           |
| Acquired immune deficiency syndrome        | 042, 043, 044, B20, B21, B22, B23, B2                                                                                                                                                                                                                                                                                                                                                                                                                                                                                                                                                                                                                                                           |
| Hypertension                               | 401, 402, 403, 404, 405, I10, I11, I12, I13, I15, N26                                                                                                                                                                                                                                                                                                                                                                                                                                                                                                                                                                                                                                           |
| Hyperlipidemia                             | 272, E75.2, E75.3, E75.5, E75.6, E77, E78, E88.1, E88.2, E88.8                                                                                                                                                                                                                                                                                                                                                                                                                                                                                                                                                                                                                                  |
| Diabetes mellitus without end organ damage | 250.0, 250.1, 250.2, 250.3, 250.8, 250.9, E10.1, E10.5, E10.9, E11.1, E11.5, E11.9, E13.1, E13.5, E13.9, E14.1, E14.5, E14                                                                                                                                                                                                                                                                                                                                                                                                                                                                                                                                                                      |
| Diabetes mellitus with end organ damage    | 250.4, 250.5, 250.6, 250.7, E10.2, E10.3, E10.4, E11.2, E11.3, E11.4, E13.2, E13.3, E13.4, E14.2, E14.3, E14                                                                                                                                                                                                                                                                                                                                                                                                                                                                                                                                                                                    |
| Intracranial bleeding                      | 430, 431, 432.0, 432.1, 432.9, 852.0, 852.2, 852.4, 853.0, I60, I61, I62, S06.340A, S06.341A, S06.342A, S06.343A, S06.344A, S06.345A, S06.346A, S06.347A, S06.348A, S06.349A, S06.350A, S06.351A, S06.352A, S06.353A, S06.354A, S06.355A, S06.356A, S06.357A, S06.358A, S06.359A, S06.360A, S06.361A, S06.362A, S06.363A, S06.364A, S06.365A, S06.366A, S06.367A, S06.368A, S06.369A, S06.4x0A, S06.4x1A, S06.4x2A, S06.4x3A, S06.4x4A, S06.4x5A, S06.4x6A, S06.4x7A, S06.4x8A, S06.4x9A, S06.5x0A, S06.5x1A, S06.5x2A, S06.5x3A, S06.5x4A, S06.5x5A, S06.5x6A, S06.5x7A, S06.5x8A, S06.5x9A, S06.6x0A, S06.6x1A, S06.6x2A, S06.6x3A, S06.6x4A, S06.6x5A, S06.6x6A, S06.6x7A, S06.6x8A, S06.6x9 |
| Ocular bleeding                            | 360.43, 362.81, 363.6, 364.4, 372.72, 376.32, 377.42, 379.23, H05.23, H11.3, H21.0, H31.3, H35.6, H43.1, H44.8, H47.0                                                                                                                                                                                                                                                                                                                                                                                                                                                                                                                                                                           |
| Intraabdominal bleeding                    | 568.81, 866.01, 866.02, 866.11, 866.12, K66.1, S31.001A, S37.011                                                                                                                                                                                                                                                                                                                                                                                                                                                                                                                                                                                                                                |
| Hemopericardium or pericardial bleeding    | 423.0, I31                                                                                                                                                                                                                                                                                                                                                                                                                                                                                                                                                                                                                                                                                      |
| Hematoma or compartment syndrome           | 599.7, M79.A, N30.01, N30.21, N30.31, N30.81, N30.91, R3                                                                                                                                                                                                                                                                                                                                                                                                                                                                                                                                                                                                                                        |
| Gastrointestinal bleeding                  | 530.7, 531, 531.2, 531.4, 531.6, 532, 533, 534, 535.01, 535.11, 535.21, 535.31, 535.41, 535.51, 535.61, 535.71, 537.83, 537.84, 562.02, 562.03, 562.12, 562.13, 569.3, 569.85, 578, K22.6, K25, K26, K27, K28, K29.01, K29.21, K29.31, K29.41, K29.51, K29.61, K29.71, K29.81, K29.91, K31.811, K31.82, K52.81, K55.21, K56.60, K56.60, K57.01, K57.11, K57.13, K57.21, K57.31, K57.33, K57.81, K57.91, K57.93, K62.5, K92.0, K92.1, K92                                                                                                                                                                                                                                                        |
| Other bleeding                             | 302.7, F52.0, F52.1, F52.2, F52.3, F52.4, F52.6, F52.8, F52.9, R3                                                                                                                                                                                                                                                                                                                                                                                                                                                                                                                                                                                                                               |



**Appendix 2 (Supplementary Table S2).** Proportion of laboratory data with no missing test values in inpatient data

| <b>Features</b>                                      | <b>Inpatient data<br/>(N = 2028)</b> |
|------------------------------------------------------|--------------------------------------|
| White blood cell                                     | 699 (34.47)                          |
| Segment                                              | 599 (29.54)                          |
| Lymphocyte                                           | 599 (29.54)                          |
| Monocyte                                             | 599 (29.54)                          |
| Eosinophil                                           | 599 (29.54)                          |
| Basophil                                             | 599 (29.54)                          |
| Red blood cell                                       | 614 (30.28)                          |
| Hemoglobin                                           | 619 (30.52)                          |
| Hematocrit                                           | 619 (30.52)                          |
| Mean corpuscular volume                              | 614 (30.28)                          |
| Mean corpuscular hemoglobin                          | 614 (30.28)                          |
| Mean corpuscular hemoglobin concentration            | 614 (30.28)                          |
| Red cell distribution width-standard deviation       | 614 (30.28)                          |
| Red cell distribution width-coefficient of variation | 468 (23.08)                          |
| Platelet                                             | 614 (30.28)                          |
| Blood urea nitrogen                                  | 584 (28.80)                          |
| Serum creatinine                                     | 638 (31.46)                          |
| Aspartate aminotransferase                           | 522 (25.74)                          |
| Alanine aminotransferase                             | 481 (23.72)                          |
| Sodium                                               | 455 (22.44)                          |
| Potassium                                            | 468 (23.08)                          |

Data was expressed as N (percentage).



**Appendix 3 (Supplementary Table S3).** Characteristics of lithium-treated patients, comparing inpatient test data and outpatient test data

| Characteristics                             | Inpatient<br>(N = 204) | Outpatient<br>(N = 7) | t or $\chi^2$ | p       |
|---------------------------------------------|------------------------|-----------------------|---------------|---------|
| <b>Lithium serum levels, mmol/l</b>         | 0.70 ± 0.22            | 0.59 ± 0.24           | 1.32          | 0.188   |
| <b>Basic information</b>                    |                        |                       |               |         |
| Age, year                                   | 42.95 ± 13.82          | 46.86 ± 6.79          | -0.75         | 0.457   |
| Sex, female                                 | 87 (42.65)             | 3 (42.86)             | 0.000         | 0.991   |
| <b>Clinical characteristics</b>             |                        |                       |               |         |
| Height, m                                   | 1.64 ± 0.09            | 1.65 ± 0.07           | -0.33         | 0.745   |
| Weight, kg                                  | 70.35 ± 14.54          | 76.43 ± 20.98         | -1.07         | 0.285   |
| Systolic blood pressure, mmHg               | 122.30 ± 10.42         | 130.70 ± 18.74        | -2.03         | 0.043   |
| Diastolic blood pressure, mmHg              | 76.21 ± 7.76           | 76.14 ± 10.95         | 0.02          | 0.983   |
| <b>Lithium prescription</b>                 |                        |                       |               |         |
| Daily dose, mg/day                          | 896.30 ± 257.20        | 857.10 ± 364.50       | 0.39          | 0.696   |
| Dosing frequency, time/day                  | 2.60 ± 0.73            | 2.43 ± 1.27           | 0.60          | 0.547   |
| Last dose, mg                               | 362.50 ± 131.30        | 385.70 ± 146.40       | 1.24          | 0.647   |
| Time interval, hour                         | 13.11 ± 1.32           | 13.43 ± 1.27          | -0.63         | 0.527   |
| <b>Concomitant psychotropic drugs</b>       |                        |                       |               |         |
| <b>Mood stabilizers</b>                     |                        |                       |               |         |
| Carbamazepine                               | 11 (5.39)              | 1 (14.29)             | 1.00          | 0.318   |
| Lamotrigine                                 | 7 (3.43)               | 1 (14.29)             | 2.19          | 0.139   |
| Topiramate                                  | 15 (7.35)              | 0 (0.00)              | 0.55          | 0.457   |
| Valproic acid                               | 67 (32.84)             | 5 (71.43)             | 4.48          | 0.034   |
| <b>Antidepressants</b>                      |                        |                       |               |         |
| SSRI                                        | 24 (11.76)             | 0 (0.00)              | 0.93          | 0.335   |
| SNRI                                        | 10 (4.90)              | 0 (0.00)              | 0.36          | 0.548   |
| Trazodone                                   | 4 (1.96)               | 0 (0.00)              | 0.14          | 0.708   |
| Mirtazapine                                 | 7 (3.43)               | 0 (0.00)              | 0.25          | 0.618   |
| Bupropion                                   | 8 (3.92)               | 0 (0.00)              | 0.29          | 0.593   |
| Agomelatine                                 | 7 (3.43)               | 0 (0.00)              | 0.25          | 0.618   |
| <b>Antipsychotics</b>                       |                        |                       |               |         |
| Typical antipsychotics                      | 23 (11.27)             | 0 (0.00)              | 0.89          | 0.347   |
| The benzamides                              | 7 (3.43)               | 0 (0.00)              | 0.25          | 0.618   |
| The -dones                                  | 49 (24.02)             | 0 (0.00)              | 2.19          | 0.139   |
| The -pines                                  | 129 (63.24)            | 0 (0.00)              | 11.39         | 0.001   |
| Aripiprazole                                | 23 (11.27)             | 0 (0.00)              | 0.89          | 0.347   |
| <b>Anxiolytics, sedatives, or hypnotics</b> |                        |                       |               |         |
| Benzodiazepines                             | 169 (82.84)            | 0 (0.00)              | 29.13         | <0.0001 |
| Non-benzodiazepines                         | 32 (15.69)             | 0 (0.00)              | 1.29          | 0.255   |
| <b>Acetylcholinesterase inhibitors</b>      | 1 (0.49)               | 0 (0.00)              | 0.03          | 0.853   |
| <b>Mental disorders</b>                     |                        |                       |               |         |
| Bipolar disorders                           | 150 (73.53)            | 5 (71.43)             | 0.02          | 0.902   |
| <b>Laboratory data</b>                      |                        |                       |               |         |
| Serum creatinine, mg/dL                     | 0.80 ± 0.16            | 0.80 ± 0.12           | -0.90         | 0.970   |
| BUN, mg/dL                                  | 9.97 ± 2.58            | 10.86 ± 2.01          | -0.04         | 0.368   |

Abbreviations: BUN; blood urea nitrogen; SNRI, serotonin norepinephrine reuptake inhibitor; SSRI, selective serotonin reuptake inhibitor.

Data was expressed as N (percentage) or mean ± standard deviation. Time interval is the time between the blood draw and last lithium dose.



**Appendix 4 (Supplementary Table S4).** Detail information of binary outcomes in inpatient test data and outpatient test data

| Model                  | TP               | TN            | FP            | FN           | TPR<br>(Sensitivity)   | TNR<br>(Specificity)   | PPV<br>(Precision)     | NPV                    | AUC-ROC                | F-score                | Accuracy               |
|------------------------|------------------|---------------|---------------|--------------|------------------------|------------------------|------------------------|------------------------|------------------------|------------------------|------------------------|
| <b>LogR</b>            |                  |               |               |              |                        |                        |                        |                        |                        |                        |                        |
| Inpatient<br>(n = 204) | 118<br>(112-124) | 31<br>(25-36) | 40<br>(35-46) | 15<br>(9-21) | 0.886<br>(0.839-0.932) | 0.431<br>(0.356-0.506) | 0.745<br>(0.726-0.764) | 0.675<br>(0.600-0.750) | 0.748<br>(0.732-0.764) | 0.809<br>(0.792-0.826) | 0.727<br>(0.707-0.748) |
| Outpatient<br>(n = 7)  | 5<br>(5-5)       | 2<br>(2-2)    | 0<br>(0-0)    | 0<br>(0-0)   | 1.000<br>(1.000-1.000) |
| <b>SVM</b>             |                  |               |               |              |                        |                        |                        |                        |                        |                        |                        |
| Inpatient<br>(n = 204) | 125<br>(121-129) | 23<br>(17-29) | 48<br>(42-54) | 8<br>(4-12)  | 0.940<br>(0.911-0.969) | 0.324<br>(0.241-0.407) | 0.723<br>(0.702-0.744) | 0.747<br>(0.675-0.819) | 0.759<br>(0.744-0.774) | 0.817<br>(0.806-0.828) | 0.725<br>(0.706-0.745) |
| Outpatient<br>(n = 7)  | 5<br>(4-5)       | 1<br>(1-2)    | 1<br>(0-1)    | 0<br>(0-1)   | 0.920<br>(0.784-1.056) | 0.700<br>(0.360-1.040) | 0.887<br>(0.757-1.016) | 0.800<br>(0.460-1.140) | 0.960<br>(0.892-1.028) | 0.902<br>(0.778-1.026) | 0.857<br>(0.680-1.035) |
| <b>RF</b>              |                  |               |               |              |                        |                        |                        |                        |                        |                        |                        |
| Inpatient<br>(n = 204) | 127<br>(126-129) | 16<br>(10-22) | 55<br>(49-61) | 6<br>(4-7)   | 0.958<br>(0.947-0.969) | 0.220<br>(0.134-0.305) | 0.697<br>(0.676-0.719) | 0.728<br>(0.659-0.797) | 0.784<br>(0.754-0.814) | 0.807<br>(0.794-0.820) | 0.701<br>(0.675-0.727) |
| Outpatient<br>(n = 7)  | 5<br>(5-5)       | 2<br>(1-2)    | 0<br>(0-1)    | 0<br>(0-0)   | 1.000<br>(1.000-1.000) | 0.900<br>(0.622-1.178) | 0.967<br>(0.874-1.059) | 1.000<br>(1.000-1.000) | 1.000<br>(1.000-1.000) | 0.982<br>(0.931-1.032) | 0.971<br>(0.892-1.051) |
| <b>XGBoost</b>         |                  |               |               |              |                        |                        |                        |                        |                        |                        |                        |
| Inpatient<br>(n = 204) | 120<br>(116-125) | 27<br>(24-29) | 44<br>(42-47) | 13<br>(8-17) | 0.904<br>(0.870-0.938) | 0.377<br>(0.344-0.411) | 0.731<br>(0.721-0.741) | 0.681<br>(0.607-0.756) | 0.775<br>(0.741-0.810) | 0.808<br>(0.792-0.825) | 0.721<br>(0.700-0.741) |
| Outpatient<br>(n = 7)  | 4<br>(2-5)       | 2<br>(1-2)    | 0<br>(0-1)    | 1<br>(0-3)   | 0.720<br>(0.498-0.942) | 0.900<br>(0.622-1.178) | 0.950<br>(0.811-1.089) | 0.600<br>(0.286-0.914) | 0.960<br>(0.849-1.071) | 0.811<br>(0.647-0.975) | 0.771<br>(0.569-0.974) |

Abbreviations: AUC-ROC, area under the curve of receiver operator characteristic; FN, false negative; FP, false positive; LogR, logistic regression; NPV, negative predictive value; PPV, positive predictive value; RF, random forests; SVM, support vector machine; TN, true negative; TP, true positive; TNR, true negative rate; TPR, true positive rate; XGBoost, extreme gradient boosting.



**Appendix 5 (Supplementary Table S5).** Detail information of continuous outcomes in inpatient test data and outpatient test data

| Model                  | MAE                 | MSE                 | RMSE                | R <sup>2</sup>      | Accuracy            |
|------------------------|---------------------|---------------------|---------------------|---------------------|---------------------|
| <b>LinR</b>            |                     |                     |                     |                     |                     |
| Inpatient<br>(n = 204) | 0.159 (0.156-0.162) | 0.038 (0.037-0.040) | 0.196 (0.193-0.199) | 0.209 (0.187-0.231) | 0.690 (0.677-0.703) |
| Outpatient<br>(n = 7)  | 0.144 (0.136-0.152) | 0.031 (0.028-0.034) | 0.175 (0.167-0.183) | 0.227 (0.153-0.300) | 0.667 (0.529-0.805) |
| <b>SVM</b>             |                     |                     |                     |                     |                     |
| Inpatient<br>(n = 204) | 0.140 (0.134-0.145) | 0.031 (0.028-0.033) | 0.175 (0.167-0.183) | 0.370 (0.312-0.427) | 0.751 (0.710-0.792) |
| Outpatient<br>(n = 7)  | 0.151 (0.143-0.159) | 0.032 (0.029-0.035) | 0.178 (0.170-0.187) | 0.198 (0.122-0.274) | 0.689 (0.538-0.840) |
| <b>RF</b>              |                     |                     |                     |                     |                     |
| Inpatient<br>(n = 204) | 0.152 (0.147-0.156) | 0.035 (0.034-0.037) | 0.188 (0.184-0.192) | 0.273 (0.245-0.301) | 0.680 (0.665-0.696) |
| Outpatient<br>(n = 7)  | 0.140 (0.129-0.151) | 0.027 (0.022-0.033) | 0.165 (0.149-0.180) | 0.315 (0.181-0.448) | 0.756 (0.640-0.871) |
| <b>XGBoost</b>         |                     |                     |                     |                     |                     |
| Inpatient<br>(n = 204) | 0.155 (0.150-0.159) | 0.037 (0.036-0.039) | 0.193 (0.189-0.196) | 0.236 (0.206-0.266) | 0.683 (0.671-0.695) |
| Outpatient<br>(n = 7)  | 0.121 (0.108-0.134) | 0.022 (0.018-0.026) | 0.149 (0.136-0.163) | 0.436 (0.337-0.535) | 0.778 (0.680-0.875) |

Abbreviations: LinR, linear regression; MAE, mean absolute error; MSE, mean-square error; RF, random forests; RMSE, root-mean-square error; SVM, support vector machine; XGBoost, extreme gradient boosting.



**Appendix 6 (Supplementary Figure S1).** LASSO method for selecting the top 10 features in logistic regression, binary outcomes

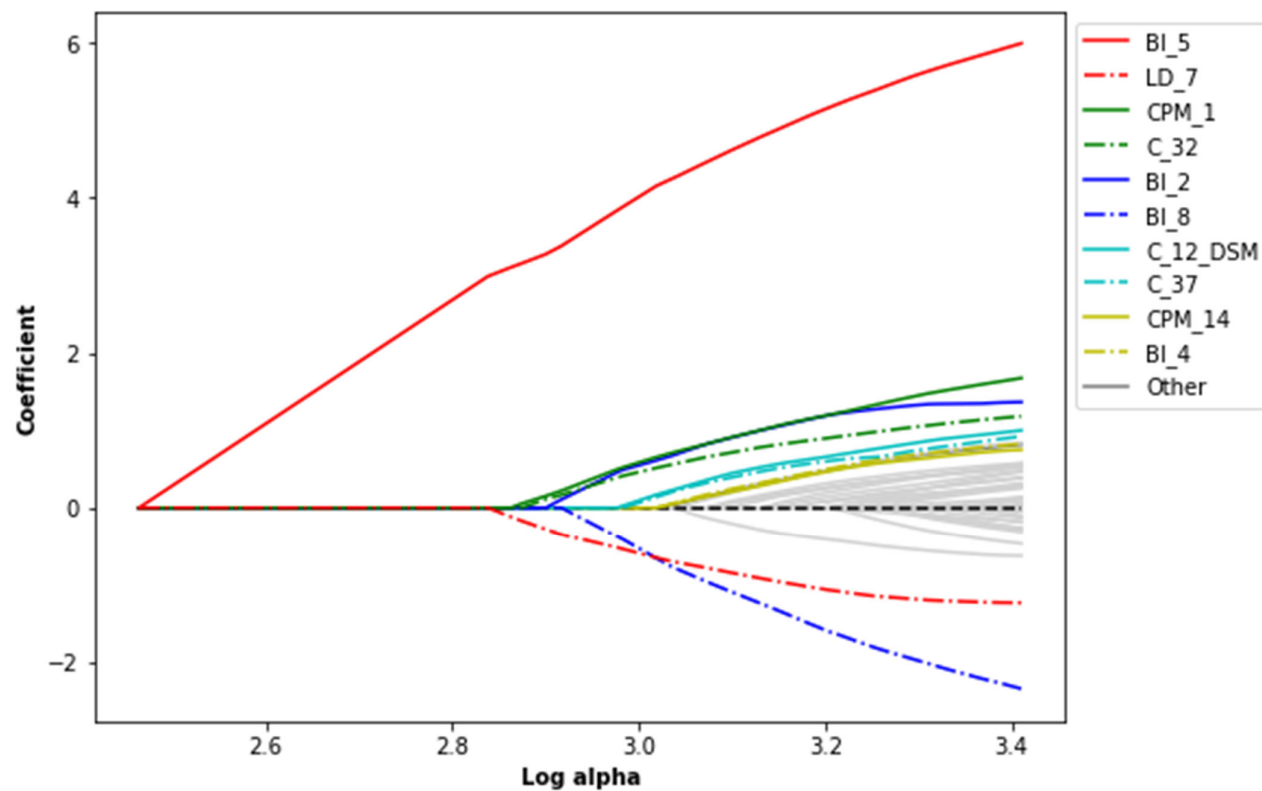

BI\_5 = Daily dose, LD\_7 = Mean corpuscular hemoglobin concentration, CPM\_1 = Valproic acid, C\_32 = Renal diseases, BI\_2 = Age, BI\_8 = Weight, C\_12\_DSM = Substance-related and addictive disorders, C\_37 = Hypertension, CPM\_14 = The -pines, BI\_4 = Last dose.



**Appendix 7 (Supplementary Figure S2).** Backward stepwise method for selecting the top 10 features in support vector machine, binary outcomes

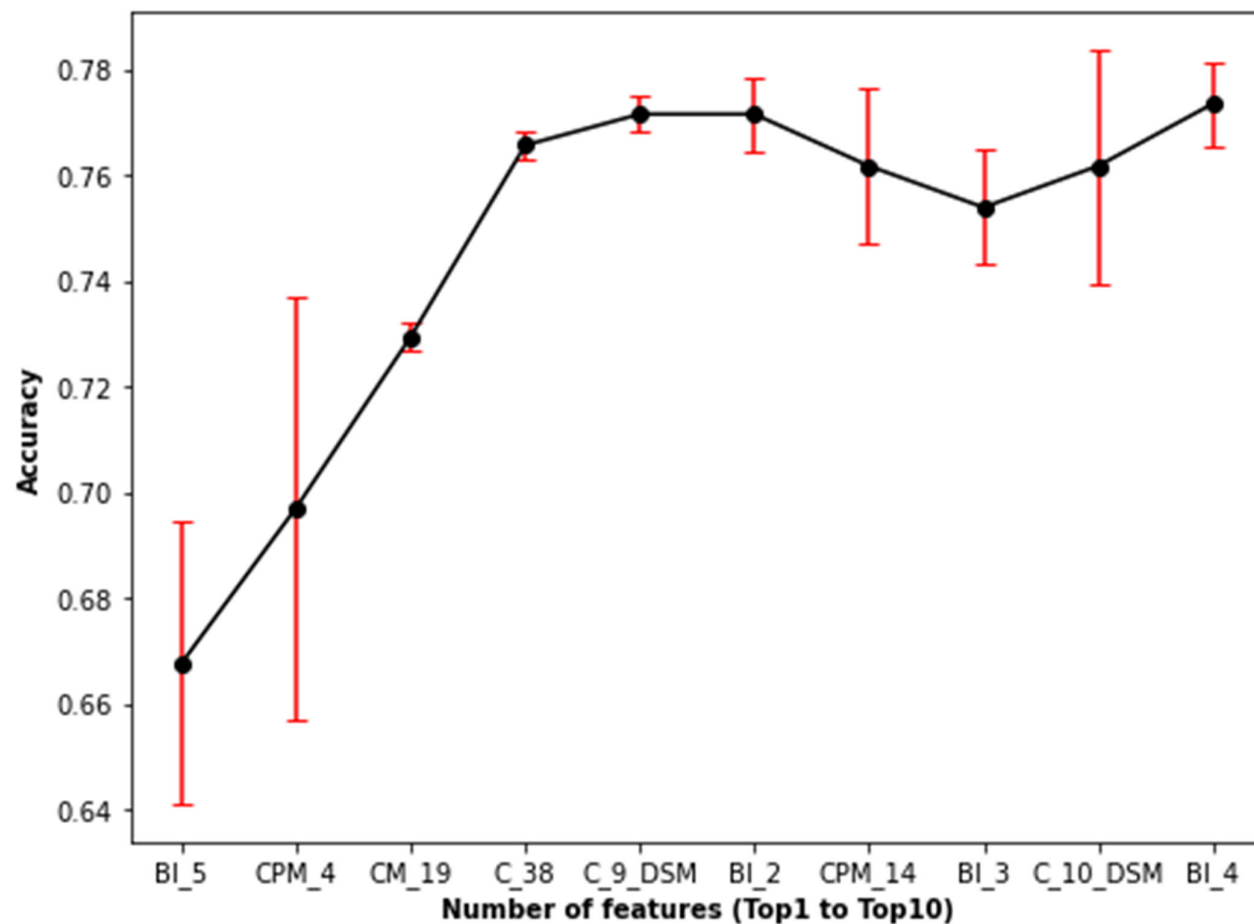

BI\_5 = Daily dose, CPM\_4 = Topiramate, CM\_19 = Non-steroidal anti-inflammatory drugs, C\_38 = Hyperlipidemia, C\_9\_DSM = Elimination disorders, BI\_2 = Age, CPM\_14 = The -pines, BI\_3 = Time interval, C\_10\_DSM = Sleep-wake disorders, BI\_4 = Last dose.



**Appendix 8 (Supplementary Figure S3).** Shapley additive explanations method for selecting the top 10 features in random forests, binary outcomes

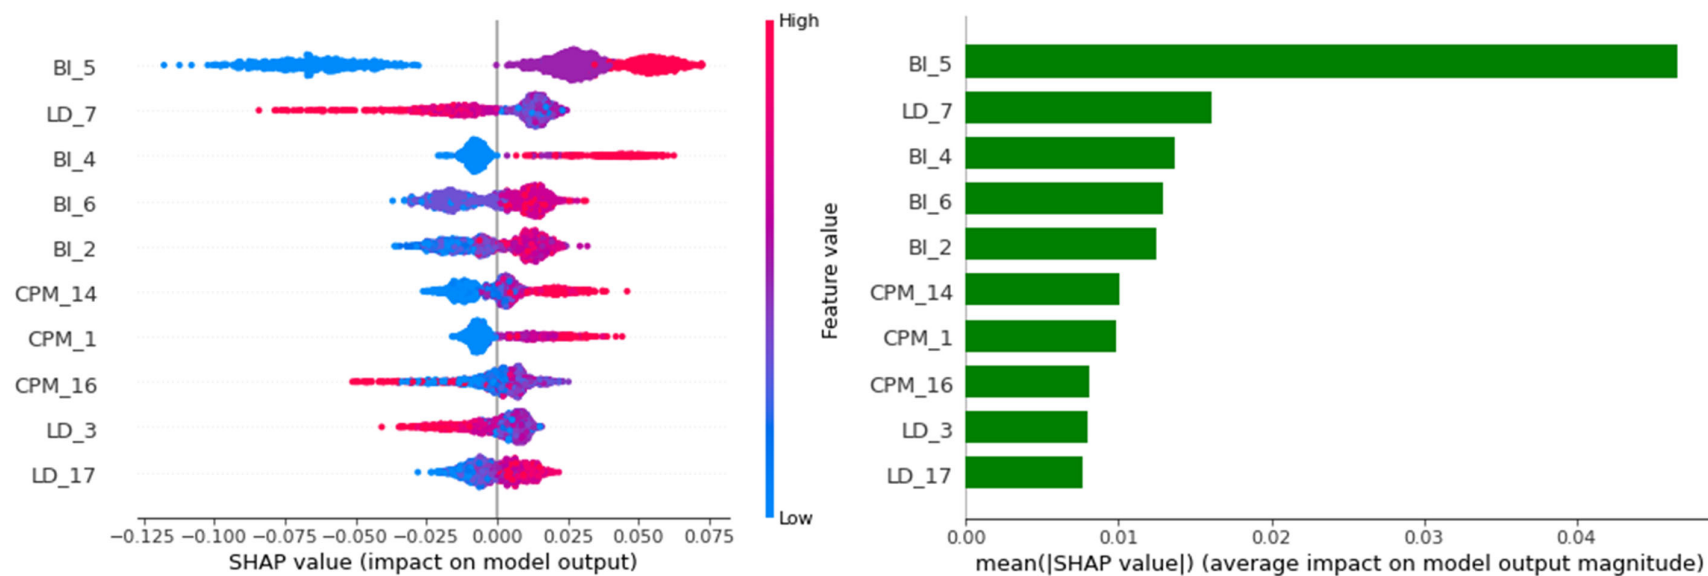

BI\_5 = Daily dose, LD\_7 = Mean corpuscular hemoglobin concentration, BI\_4 = Last dose, BI\_6 = Dosing frequency, BI\_2 = Age, CPM\_14 = The -pines, CPM\_1 = Valproic acid, CPM\_16 = Benzodiazepines, LD\_3 = Hemoglobin, LD\_17 = Serum creatinine.



**Appendix 9 (Supplementary Figure S4).** Shapley additive explanations method for selecting the top 10 features in extreme gradient boost, binary outcomes

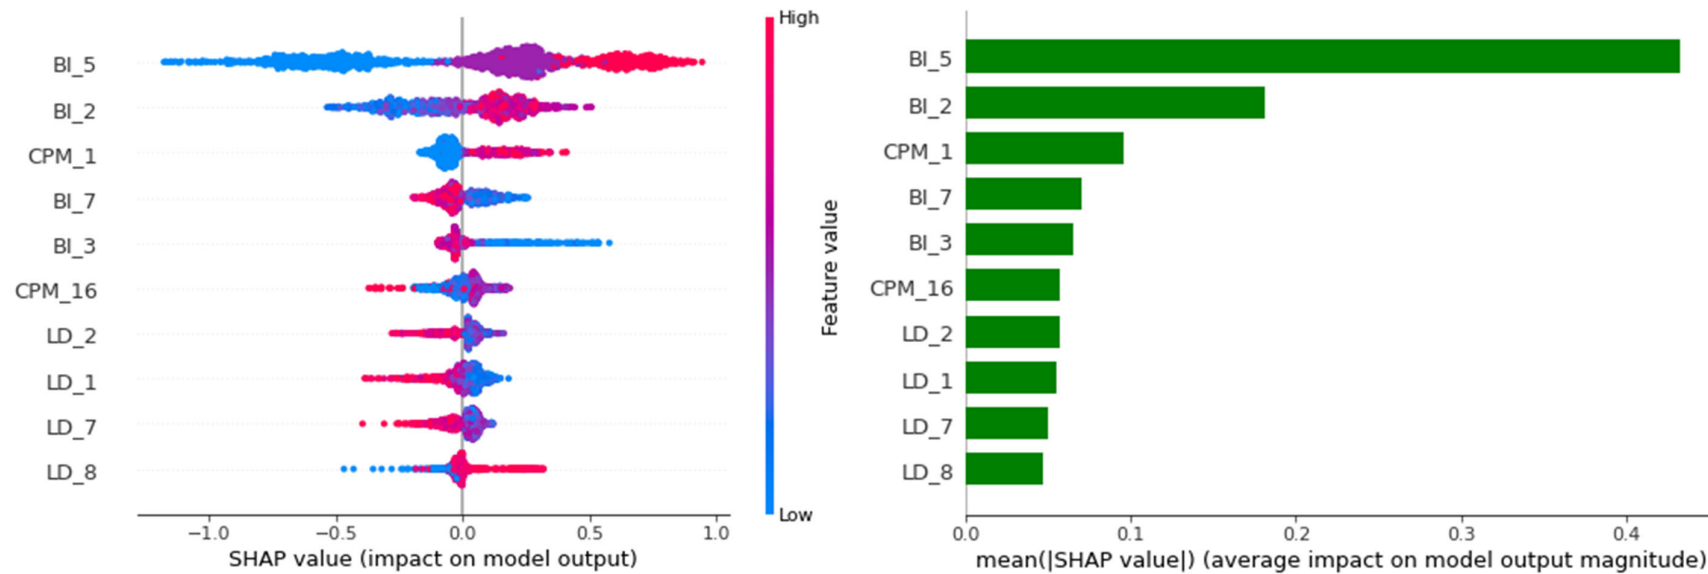

BI\_5 = Daily dose, BI\_2 = Age, CPM\_1 = Valproic acid, BI\_7 = Height, BI\_3 = Time interval, CPM\_16 = Benzodiazepines, LD\_2 = Red blood cell, LD\_1 = White blood cell, LD\_7 = Mean corpuscular hemoglobin concentration, LD\_8 = Red cell distribution width-standard deviation.



**Appendix 10 (Supplementary Table S6).** 114 feature importance ranking results of the 4 different machine learning algorithms in binary outcomes

| Rank | Logistic regression                                | Support vector machine                               | Random forests                                           | Extreme gradient boosting                                |
|------|----------------------------------------------------|------------------------------------------------------|----------------------------------------------------------|----------------------------------------------------------|
| 1    | Daily dose                                         | Daily dose                                           | Daily dose                                               | Daily dose                                               |
| 2    | Mean corpuscular hemoglobin concentration (gHb/dL) | Topiramate                                           | Mean corpuscular hemoglobin concentration (gHb/dL)       | Age                                                      |
| 3    | Valproic acid                                      | Non-steroidal anti-inflammatory drugs                | Last dose                                                | Valproic acid                                            |
| 4    | Renal diseases                                     | Hyperlipidemia                                       | Dosing frequency                                         | Height (m)                                               |
| 5    | Age                                                | Elimination disorders                                | Age                                                      | Time interval                                            |
| 6    | Weight (Kg)                                        | Age                                                  | The -pines                                               | Benzodiazepines                                          |
| 7    | Substance-related and addictive disorders          | The -pines                                           | Valproic acid                                            | Red blood cell (count/uL)                                |
| 8    | Hypertension                                       | Time interval                                        | Benzodiazepines                                          | White blood cell (count/uL)                              |
| 9    | The -pines                                         | Sleep-wake disorders                                 | Hemoglobin (g/dL)                                        | Mean corpuscular hemoglobin concentration (gHb/dL)       |
| 10   | Last dose                                          | Last dose                                            | Serum creatinine (mg/dL)                                 | Red cell distribution width-standard deviation(fL)       |
| 11   | Potassium (mg/dL)                                  | Diabetes mellitus without end organ damage           | Red blood cell (count/uL)                                | Last dose                                                |
| 12   | Systolic blood pressure (mmHg)                     | Hypertension                                         | Weight (Kg)                                              | Weight (Kg)                                              |
| 13   | Angiotensin receptor blockers                      | Bipolar and related disorders                        | Red cell distribution width-coefficient of variation (%) | The -dones                                               |
| 14   | Serotonin norepinephrine reuptake inhibitor        | Dosing frequency                                     | White blood cell (count/uL)                              | Red cell distribution width-coefficient of variation (%) |
| 15   | Dipeptidyl peptidase 4 inhibitors                  | Systolic blood pressure (mmHg)                       | Height (m)                                               | The -pines                                               |
| 16   | Agomelatine                                        | Cerebrovascular diseases                             | Hematocrit (%)                                           | Topiramate                                               |
| 17   | Trauma- and stressor-related disorders             | Substance-related and addictive disorders            | Serum creatinine (mg/dL)                                 | Serum creatinine (mg/dL)                                 |
| 18   | Elimination disorders                              | Gastrointestinal bleeding                            | Red cell distribution width-standard deviation(fL)       | Natrium (mg/dL)                                          |
| 19   | Non-steroidal anti-inflammatory drugs              | Valproic acid                                        | Potassium (mg/dL)                                        | Blood urea nitrogen (mg/dL)                              |
| 20   | Selective serotonin reuptake inhibitor             | Renal diseases                                       | Systolic blood pressure (mmHg)                           | Non-steroidal anti-inflammatory drugs                    |
| 21   | Topiramate                                         | Benzodiazepines                                      | Hypertension                                             | Substance-related and addictive disorders                |
| 22   | Obsessive-compulsive and related disorders         | Non-benzodiazepines                                  | The -dones                                               | Alanine aminotransferase (U/L)                           |
| 23   | The -dones                                         | Neurodevelopmental disorders                         | White blood cell-segment (%)                             | Hemoglobin (g/dL)                                        |
| 24   | Beta blockers                                      | Selective serotonin reuptake inhibitor               | Alanine aminotransferase (U/L)                           | Potassium (mg/dL)                                        |
| 25   | Height (m)                                         | Weight (Kg)                                          | Aspartate aminotransferase (U/L)                         | Dosing frequency                                         |
| 26   | Serum creatinine (mg/dL)                           | White blood cell-monocyte (%)                        | Blood urea nitrogen (mg/dL)                              | Systolic blood pressure (mmHg)                           |
| 27   | Trazodone                                          | Personality disorders                                | Diastolic blood pressure (mmHg)                          | Platelet (count/uL)                                      |
| 28   | Angiotensin converting enzyme inhibitors           | Any cancer                                           | White blood cell-monocyte (%)                            | White blood cell-segment (%)                             |
| 29   | Anxiety disorders                                  | Anxiety disorders                                    | Platelet (count/uL)                                      | Depressive disorders                                     |
| 30   | Dissociative disorders                             | Obsessive-compulsive and related disorders           | White blood cell-lymphocyte (%)                          | Hypertension                                             |
| 31   | Hematocrit (%)                                     | Mean corpuscular hemoglobin concentration (gHb/dL)   | White blood cell-eosinophil (%)                          | Aspartate aminotransferase (U/L)                         |
| 32   | Calcium channel blockers                           | Schizophrenia spectrum and other psychotic disorders | Mean corpuscular volume (fL)                             | Hyperlipidemia                                           |



|    |                                                    |                                                          |                                                      |                                                      |
|----|----------------------------------------------------|----------------------------------------------------------|------------------------------------------------------|------------------------------------------------------|
| 33 | Time interval                                      | Beta blockers                                            | Mean corpuscular hemoglobin (pg)                     | Aripiprazole                                         |
| 34 | Acquired immune deficiency syndrome                | Trauma- and stressor-related disorders                   | Renal diseases                                       | Diastolic blood pressure (mmHg)                      |
| 35 | Ocular bleeding                                    | Feeding and eating disorders                             | Bipolar and related disorders                        | Angiotensin receptor blockers                        |
| 36 | Disruptive, impulse-control, and conduct disorders | Intracranial bleeding                                    | Substance-related and addictive disorders            | White blood cell-eosinophil (%)                      |
| 37 | Hyperlipidemia                                     | White blood cell-basophil (%)                            | Time interval                                        | Beta blockers                                        |
| 38 | White blood cell-eosinophil (%)                    | The -dones                                               | White blood cell-basophil (%)                        | White blood cell-lymphocyte (%)                      |
| 39 | Sodium (mg/dL)                                     | Mean corpuscular hemoglobin (pg)                         | Anxiety disorders                                    | White blood cell-monocyte (%)                        |
| 40 | Acetylcholinesterase inhibitors                    | Angiotensin receptor blockers                            | Beta blockers                                        | Schizophrenia spectrum and other psychotic disorders |
| 41 | White blood cell (count/uL)                        | Hematocrit (%)                                           | Topiramate                                           | Mean corpuscular volume (fL)                         |
| 42 | Other bleeding                                     | Depressive disorders                                     | Gastrointestinal bleeding                            | Gastrointestinal bleeding                            |
| 43 | Sodium-glucose cotransporter 2 inhibitors          | White blood cell-lymphocyte (%)                          | Aripiprazole                                         | Hematocrit (%)                                       |
| 44 | Alanine aminotransferase (U/L)                     | Serum creatinine (mg/dL)                                 | Trauma- and stressor-related disorders               | White blood cell-basophil (%)                        |
| 45 | Diabetes mellitus without end organ damage         | Sex                                                      | Typical antipsychotics                               | Mean corpuscular hemoglobin (pg)                     |
| 46 | Feeding and eating disorders                       | Metformin                                                | Angiotensin converting enzyme inhibitors             | Neurodevelopmental disorders                         |
| 47 | Fibrates                                           | Acquired immune deficiency syndrome                      | Non-steroidal anti-inflammatory drugs                | Renal diseases                                       |
| 48 | Any cancer                                         | Lamotrigine                                              | Depressive disorders                                 | Mirtazapine                                          |
| 49 | Other antiplatelet                                 | Diuretics                                                | Hyperlipidemia                                       | Non-benzodiazepines                                  |
| 50 | Aripiprazole                                       | Hemiplegia                                               | Calcium channel blockers                             | Calcium channel blockers                             |
| 51 | Gastrointestinal bleeding                          | Hemopericardium or pericardial bleeding                  | Disruptive, impulse-control, and conduct disorders   | Antacids                                             |
| 52 | Hematoma or compartment syndrome                   | Dissociative disorders                                   | Sex                                                  | Carbamazepine                                        |
| 53 | Hemopericardium or pericardial bleeding            | Ocular bleeding                                          | Serotonin norepinephrine reuptake inhibitor          | Serotonin norepinephrine reuptake inhibitor          |
| 54 | Intraabdominal bleeding                            | Chronic pulmonary diseases                               | Lamotrigine                                          | Feeding and eating disorders                         |
| 55 | Intracranial bleeding                              | Liver diseases with sequelae                             | Angiotensin receptor blockers                        | Bupropion                                            |
| 56 | Metastatic solid tumor                             | Blood urea nitrogen (mg/dL)                              | Selective serotonin reuptake inhibitor               | Disruptive, impulse-control, and conduct disorders   |
| 57 | Liver diseases with sequelae                       | White blood cell (count/uL)                              | Schizophrenia spectrum and other psychotic disorders | Typical antipsychotics                               |
| 58 | Hemiplegia                                         | Congestive heart failure                                 | Non-benzodiazepines                                  | Sleep-wake disorders                                 |
| 59 | Diabetes mellitus with end organ damage            | Carbamazepine                                            | Liver diseases without sequelae                      | Anxiety disorders                                    |
| 60 | Liver diseases without sequelae                    | Neurocognitive disorders (Except vascular dementia)      | Vascular dementia                                    | Selective serotonin reuptake inhibitor               |
| 61 | Peptic ulcer diseases                              | Red cell distribution width-coefficient of variation (%) | Diabetes mellitus without end organ damage           | Bipolar and related disorders                        |
| 62 | Connective tissue diseases                         | Sexual dysfunctions                                      | Obsessive-compulsive and related disorders           | Diabetes mellitus without end organ damage           |
| 63 | Chronic pulmonary diseases                         | Intraabdominal bleeding                                  | Neurodevelopmental disorders                         | Trauma- and stressor-related disorders               |
| 64 | Vascular dementia                                  | Metastatic solid tumor                                   | Sleep-wake disorders                                 | Chronic pulmonary diseases                           |
| 65 | Cerebrovascular diseases                           | Hemoglobin (g/dL)                                        | Agomelatine                                          | Vascular dementia                                    |
| 66 | Peripheral vascular diseases                       | Agomelatine                                              | Personality disorders                                | Metformin                                            |



|     |                                                      |                                                    |                                                     |                                           |
|-----|------------------------------------------------------|----------------------------------------------------|-----------------------------------------------------|-------------------------------------------|
| 67  | Congestive heart failure                             | The benzamides                                     | Chronic pulmonary diseases                          | Liver diseases without sequelae           |
| 68  | Myocardial infarct                                   | Potassium (mg/dL)                                  | Antacids                                            | Sex                                       |
| 69  | Paraphilic disorders                                 | Alanine aminotransferase (U/L)                     | Neurocognitive disorders (Except vascular dementia) | Intraabdominal bleeding                   |
| 70  | Gender dysphoria                                     | Aripiprazole                                       | Ocular bleeding                                     | Hemopericardium or pericardial bleeding   |
| 71  | Personality disorders                                | Hematoma or compartment syndrome                   | Feeding and eating disorders                        | Myocardial infarct                        |
| 72  | Neurocognitive disorders (Except vascular dementia)  | Red cell distribution width-standard deviation(fL) | Carbamazepine                                       | Any cancer                                |
| 73  | Sexual dysfunctions                                  | Acarbose                                           | Mirtazapine                                         | Congestive heart failure                  |
| 74  | Sleep-wake disorders                                 | Thiazolidinediones                                 | Metformin                                           | Peripheral vascular diseases              |
| 75  | Somatic symptom and related disorders                | Vascular dementia                                  | Trazodone                                           | Acquired immune deficiency syndrome       |
| 76  | Depressive disorders                                 | Diabetes mellitus with end organ damage            | Statins                                             | Cerebrovascular diseases                  |
| 77  | Bipolar and related disorders                        | Fibrates                                           | Sulfonylureas                                       | Hemiplegia                                |
| 78  | Schizophrenia spectrum and other psychotic disorders | Diastolic blood pressure (mmHg)                    | Dipeptidyl peptidase 4 inhibitors                   | Intracranial bleeding                     |
| 79  | Neurodevelopmental disorders                         | Peptic ulcer diseases                              | Other bleeding                                      | Diabetes mellitus with end organ damage   |
| 80  | Antacids                                             | Serotonin norepinephrine reuptake inhibitor        | Any cancer                                          | Connective tissue diseases                |
| 81  | Amiodarone                                           | Bupropion                                          | Hematoma or compartment syndrome                    | Ocular bleeding                           |
| 82  | Aspirin                                              | Mirtazapine                                        | Liver diseases with sequelae                        | Hematoma or compartment syndrome          |
| 83  | Diuretics                                            | Disruptive, impulse-control, and conduct disorders | Bupropion                                           | Paraphilic disorders                      |
| 84  | Meglitinides                                         | Paraphilic disorders                               | Fibrates                                            | Peptic ulcer diseases                     |
| 85  | Thiazolidinediones                                   | Gender dysphoria                                   | The benzamides                                      | Liver diseases with sequelae              |
| 86  | Acarbose                                             | Platelet (count/uL)                                | Cerebrovascular diseases                            | Metastatic solid tumor                    |
| 87  | Sulfonylureas                                        | Height (m)                                         | Somatic symptom and related disorders               | Thiazolidinediones                        |
| 88  | Metformin                                            | Aspirin                                            | Elimination disorders                               | Gender dysphoria                          |
| 89  | Insulins                                             | Red blood cell (count/uL)                          | Diabetes mellitus with end organ damage             | Acarbose                                  |
| 90  | Statins                                              | Somatic symptom and related disorders              | Insulins                                            | Lamotrigine                               |
| 91  | Non-benzodiazepines                                  | Antacids                                           | Acarbose                                            | Trazodone                                 |
| 92  | Benzodiazepines                                      | Calcium channel blockers                           | Aspirin                                             | Agomelatine                               |
| 93  | The benzamides                                       | Dipeptidyl peptidase 4 inhibitors                  | Acquired immune deficiency syndrome                 | The benzamides                            |
| 94  | Typical antipsychotics                               | Typical antipsychotics                             | Intracranial bleeding                               | Acetylcholinesterase inhibitors           |
| 95  | Bupropion                                            | White blood cell-segment (%)                       | Diuretics                                           | Statins                                   |
| 96  | Mirtazapine                                          | White blood cell-eosinophil (%)                    | Hemiplegia                                          | Fibrates                                  |
| 97  | Lamotrigine                                          | Statins                                            | Sodium-glucose cotransporter 2 inhibitors           | Insulins                                  |
| 98  | Carbamazepine                                        | Angiotensin converting enzyme inhibitors           | Myocardial infarct                                  | Sodium-glucose cotransporter 2 inhibitors |
| 99  | Aspartate aminotransferase (U/L)                     | Connective tissue diseases                         | Peripheral vascular diseases                        | Dipeptidyl peptidase 4 inhibitors         |
| 100 | Blood urea nitrogen (mg/dL)                          | Myocardial infarct                                 | Thiazolidinediones                                  | Sulfonylureas                             |
| 101 | White blood cell-basophil (%)                        | Sodium-glucose cotransporter 2 inhibitors          | Acetylcholinesterase inhibitors                     | Meglitinides                              |



|     |                                                          |                                  |                                         |                                                     |
|-----|----------------------------------------------------------|----------------------------------|-----------------------------------------|-----------------------------------------------------|
| 102 | White blood cell-monocyte (%)                            | Amiodarone                       | Sexual dysfunctions                     | Dissociative disorders                              |
| 103 | White blood cell-lymphocyte (%)                          | Other antiplatelet               | Connective tissue diseases              | Angiotensin converting enzyme inhibitors            |
| 104 | White blood cell-segment (%)                             | Other bleeding                   | Congestive heart failure                | Diuretics                                           |
| 105 | Red cell distribution width-coefficient of variation (%) | Meglitinides                     | Other antiplatelet                      | Aspirin                                             |
| 106 | Platelet (count/uL)                                      | Mean corpuscular volume (fL)     | Peptic ulcer diseases                   | Other antiplatelet                                  |
| 107 | Red cell distribution width-standard deviation(fL)       | Sulfonylureas                    | Meglitinides                            | Amiodarone                                          |
| 108 | Mean corpuscular hemoglobin (pg)                         | Trazodone                        | Metastatic solid tumor                  | Obsessive-compulsive and related disorders          |
| 109 | Mean corpuscular volume (fL)                             | Aspartate aminotransferase (U/L) | Paraphilic disorders                    | Somatic symptom and related disorders               |
| 110 | Hemoglobin (g/dL)                                        | Peripheral vascular diseases     | Gender dysphoria                        | Elimination disorders                               |
| 111 | Red blood cell (count/uL)                                | Acetylcholinesterase inhibitors  | Dissociative disorders                  | Sexual dysfunctions                                 |
| 112 | Diastolic blood pressure (mmHg)                          | Insulins                         | Intraabdominal bleeding                 | Neurocognitive disorders (Except vascular dementia) |
| 113 | Dosing frequency                                         | Sodium (mg/dL)                   | Hemopericardium or pericardial bleeding | Personality disorders                               |
| 114 | Sex                                                      | Liver diseases without sequelae  | Amiodarone                              | Other bleeding                                      |



**Appendix 11 (Supplementary Figure S5).** LASSO method for selecting the top 10 features in linear regression, continuous outcomes

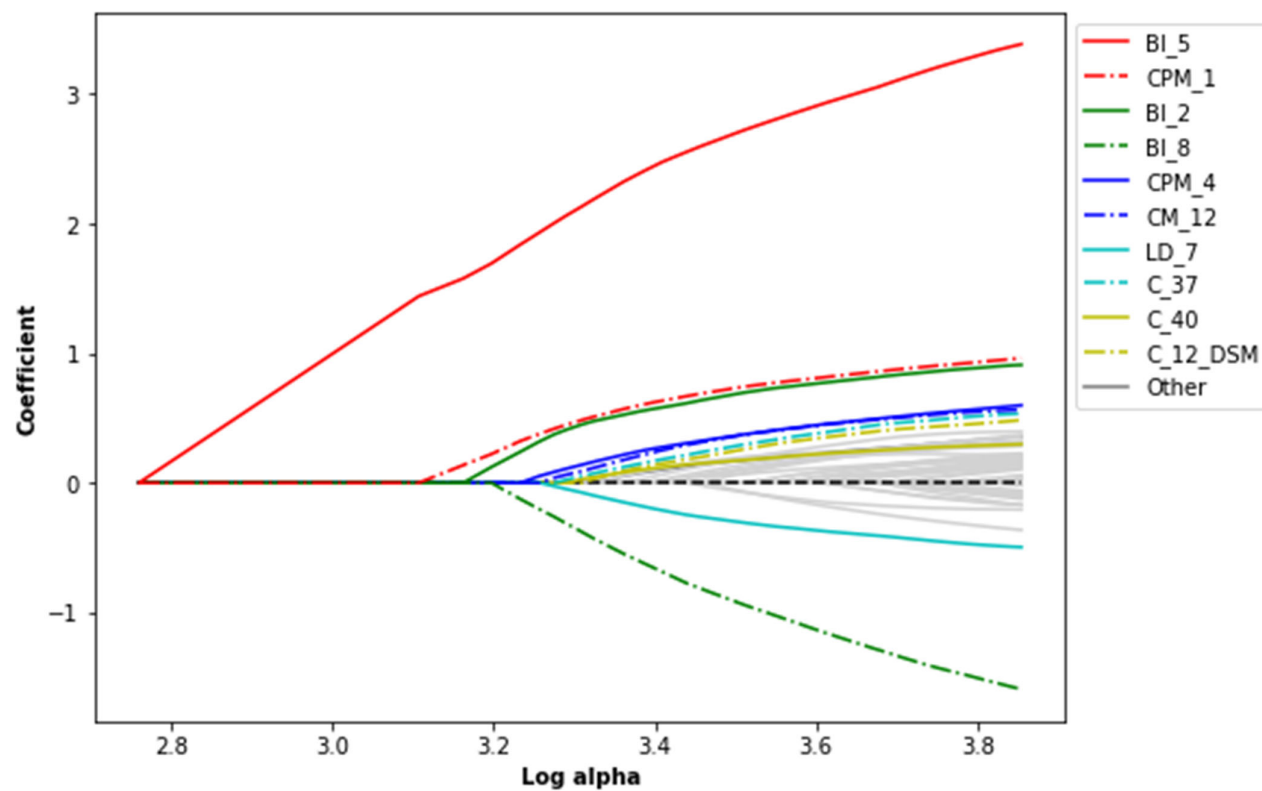

BI\_5 = Daily dose, CPM\_1 = Valproic acid, BI\_2 = Age, BI\_8 = Weight (Kg), CPM\_4 = Topiramate, CM\_12 = Angiotensin receptor blockers, LD\_7 = Mean corpuscular hemoglobin concentration, C\_37 = Hypertension, C\_40 = Ocular bleeding, C\_12\_DSM = Substance-related and addictive disorders.



**Appendix 12 (Supplementary Figure S6).** Backward stepwise method for selecting the top 10 features in support vector machine, continuous outcomes

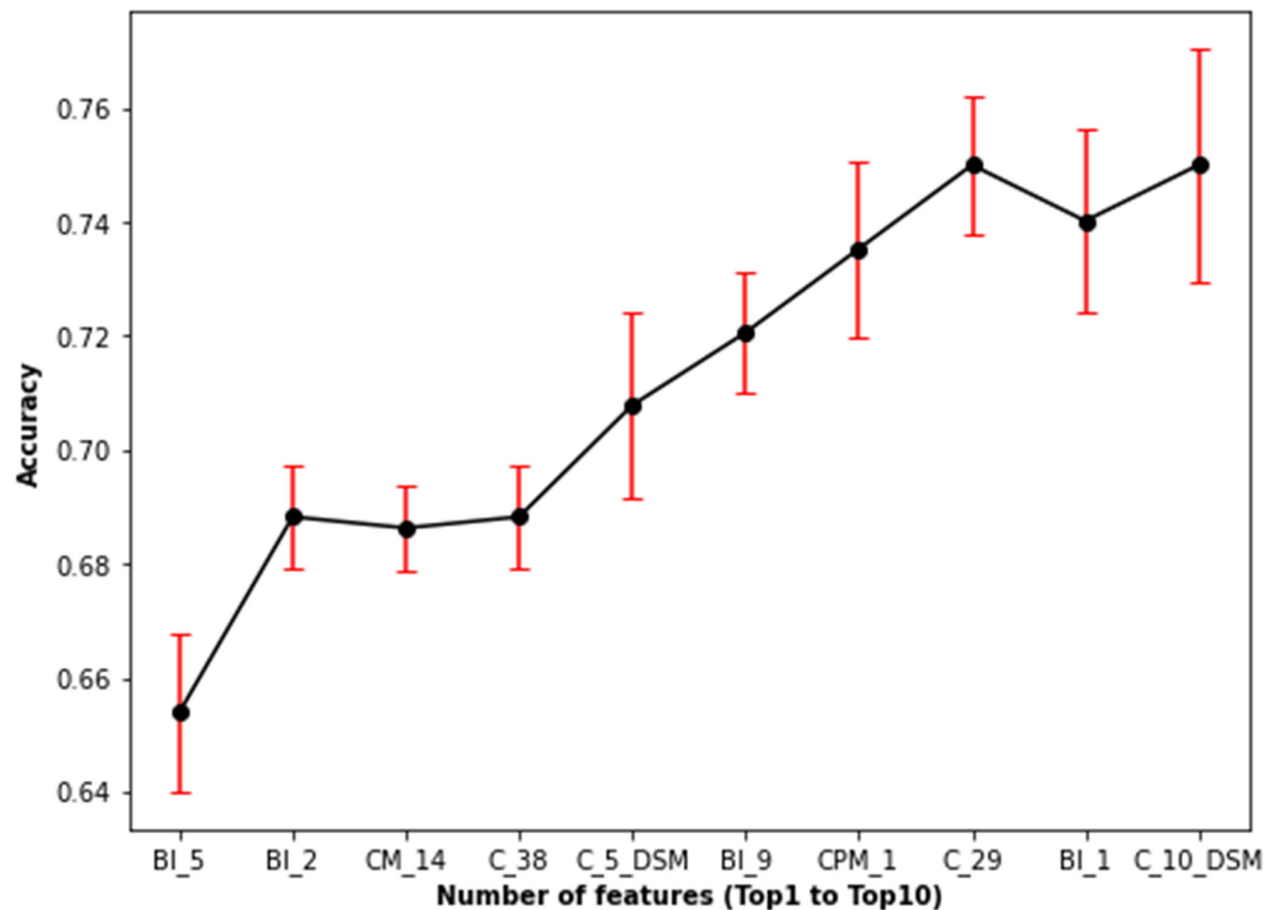

BI\_5 = Daily dose, BI\_2 = Age, CM\_14 = Beta blockers, C\_38 = Hyperlipidemia, C\_5\_DSM = Depressive disorders, BI\_9 = Systolic blood pressure, CPM\_1 = Valproic acid, C\_29 = Diabetes mellitus without end organ damage, BI\_1 = Sex, C\_10\_DSM = Sleep-wake disorders.



**Appendix 13 (Supplementary Figure S7).** Shapley additive explanations method for selecting the top 10 features in random forests, continuous outcomes

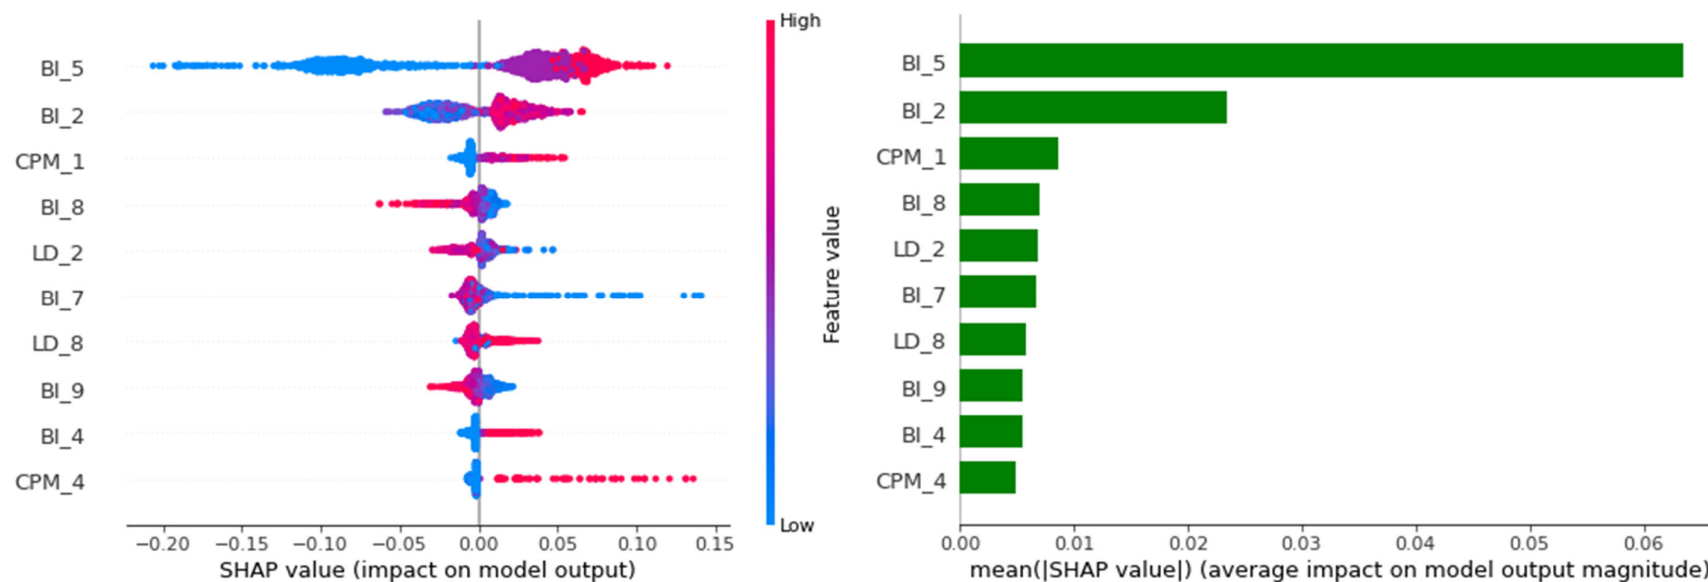

BI\_5 = Daily dose, BI\_2 = Age, CPM\_1 = Valproic acid, BI\_8 = Weight, LD\_2 = Red blood cell, BI\_7 = Height, LD\_8 = Red cell distribution width-standard deviation, BI\_9 = Systolic blood pressure, BI\_4 = Last dose, CPM\_4 = Topiramate.



**Appendix 14 (Supplementary Figure S8).** Shapley additive explanations method for selecting the top 10 features in extreme gradient boost, continuous outcomes

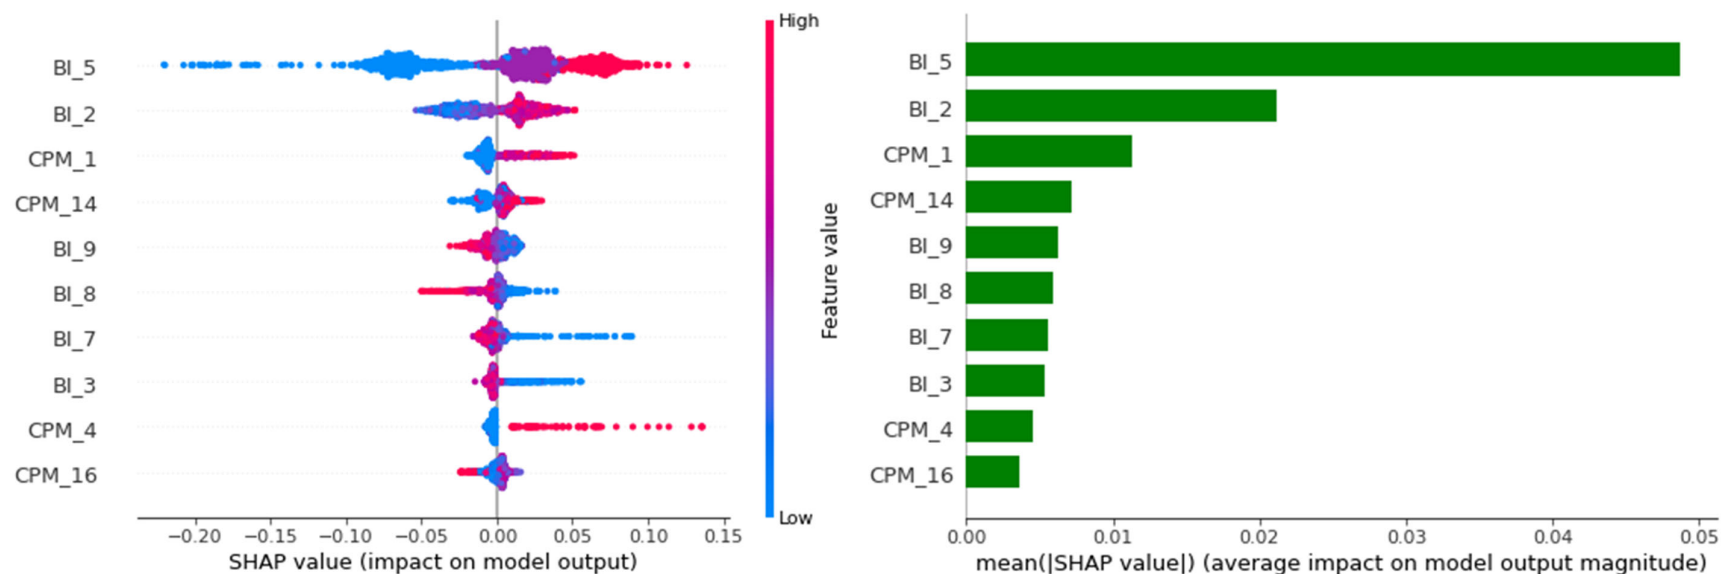

BI\_5 = Daily dose, BI\_2 = Age, CPM\_1 = Valproic acid, CPM\_14 = The -pines, BI\_9 = Systolic blood pressure, BI\_8 = Weight, BI\_7 = Height, BI\_3 = Time interval, CPM\_4 = Topiramate, CPM\_16 = Benzodiazepines.



**Appendix 15 (Supplementary Table S7).** 114 feature importance ranking results of the 4 different machine learning algorithms in continuous outcomes

| Rank | Linear regression                                   | Support vector machine                              | Random forests                                           | Extreme gradient boosting                                |
|------|-----------------------------------------------------|-----------------------------------------------------|----------------------------------------------------------|----------------------------------------------------------|
| 1    | Daily dose                                          | Daily dose                                          | Daily dose                                               | Daily dose                                               |
| 2    | Valproic acid                                       | Age                                                 | Age                                                      | Age                                                      |
| 3    | Age                                                 | Beta blockers                                       | Valproic acid                                            | Valproic acid                                            |
| 4    | Weight (Kg)                                         | Hyperlipidemia                                      | Weight (Kg)                                              | The -pines                                               |
| 5    | Topiramate                                          | Depressive disorders                                | Red blood cell (count/uL)                                | Systolic blood pressure (mmHg)                           |
| 6    | Angiotensin receptor blockers                       | Systolic blood pressure (mmHg)                      | Height (m)                                               | Weight (Kg)                                              |
| 7    | Mean corpuscular hemoglobin concentration (gHb/dL)  | Valproic acid                                       | Red cell distribution width-standard deviation(fL)       | Height (m)                                               |
| 8    | Hypertension                                        | Diabetes mellitus without end organ damage          | Systolic blood pressure (mmHg)                           | Time interval                                            |
| 9    | Ocular bleeding                                     | Sex                                                 | Last dose                                                | Topiramate                                               |
| 10   | Substance-related and addictive disorders           | Sleep-wake disorders                                | Topiramate                                               | Benzodiazepines                                          |
| 11   | Acetylcholinesterase inhibitors                     | Dosing frequency                                    | The -pines                                               | Red cell distribution width-standard deviation(fL)       |
| 12   | Depressive disorders                                | The -pines                                          | Time interval                                            | Red blood cell (count/uL)                                |
| 13   | The -pines                                          | Substance-related and addictive disorders           | Hypertension                                             | Non-steroidal anti-inflammatory drugs                    |
| 14   | Neurocognitive disorders (Except vascular dementia) | Diabetes mellitus with end organ damage             | Platelet (count/uL)                                      | Platelet (count/uL)                                      |
| 15   | Trauma- and stressor-related disorders              | Obsessive-compulsive and related disorders          | Benzodiazepines                                          | Substance-related and addictive disorders                |
| 16   | Renal diseases                                      | Liver diseases with sequelae                        | Non-steroidal anti-inflammatory drugs                    | The -dones                                               |
| 17   | Fibrates                                            | Gastrointestinal bleeding                           | Substance-related and addictive disorders                | Beta blockers                                            |
| 18   | Last dose                                           | Chronic pulmonary diseases                          | Red cell distribution width-coefficient of variation (%) | Serum creatinine (mg/dL)                                 |
| 19   | Beta blockers                                       | Vascular dementia                                   | Mean corpuscular hemoglobin concentration (gHb/dL)       | Last dose                                                |
| 20   | Systolic blood pressure (mmHg)                      | White blood cell-eosinophil (%)                     | White blood cell (count/uL)                              | Hypertension                                             |
| 21   | Potassium (mg/dL)                                   | Non-benzodiazepines                                 | The -dones                                               | Mean corpuscular hemoglobin concentration (gHb/dL)       |
| 22   | Acquired immune deficiency syndrome                 | The benzamides                                      | Serum creatinine (mg/dL)                                 | Red cell distribution width-coefficient of variation (%) |
| 23   | Agomelatine                                         | Neurocognitive disorders (Except vascular dementia) | Hemoglobin (g/dL)                                        | Dosing frequency                                         |
| 24   | Metastatic solid tumor                              | Dipeptidyl peptidase 4 inhibitors                   | Beta blockers                                            | Depressive disorders                                     |
| 25   | Natrium (mg/dL)                                     | Last dose                                           | Natrium (mg/dL)                                          | White blood cell-lymphocyte (%)                          |
| 26   | Trazodone                                           | Potassium (mg/dL)                                   | Aspartate aminotransferase (U/L)                         | Aspartate aminotransferase (U/L)                         |
| 27   | Obsessive-compulsive and related disorders          | Hemoglobin (g/dL)                                   | Mean corpuscular volume (fL)                             | Natrium (mg/dL)                                          |
| 28   | Non-steroidal anti-inflammatory drugs               | Neurodevelopmental disorders                        | Diastolic blood pressure (mmHg)                          | Hemoglobin (g/dL)                                        |
| 29   | Anxiety disorders                                   | Selective serotonin reuptake inhibitor              | Blood urea nitrogen (mg/dL)                              | White blood cell (count/uL)                              |
| 30   | The benzamides                                      | Blood urea nitrogen (mg/dL)                         | Hematocrit (%)                                           | Mean corpuscular hemoglobin (pg)                         |
| 31   | Sulfonylureas                                       | Diastolic blood pressure (mmHg)                     | Hyperlipidemia                                           | Hyperlipidemia                                           |
| 32   | Elimination disorders                               | Cerebrovascular diseases                            | Potassium (mg/dL)                                        | Angiotensin receptor blockers                            |



|    |                                                    |                                                    |                                                      |                                                     |
|----|----------------------------------------------------|----------------------------------------------------|------------------------------------------------------|-----------------------------------------------------|
| 33 | White blood cell-basophil (%)                      | Acquired immune deficiency syndrome                | Alanine aminotransferase (U/L)                       | Alanine aminotransferase (U/L)                      |
| 34 | Other bleeding                                     | Non-steroidal anti-inflammatory drugs              | Mean corpuscular hemoglobin (pg)                     | Potassium (mg/dL)                                   |
| 35 | Red cell distribution width-standard deviation(fL) | Liver diseases without sequelae                    | White blood cell-monocyte (%)                        | White blood cell-segment (%)                        |
| 36 | Serum creatinine (mg/dL)                           | Aripiprazole                                       | White blood cell-eosinophil (%)                      | White blood cell-monocyte (%)                       |
| 37 | Somatic symptom and related disorders              | White blood cell-basophil (%)                      | White blood cell-lymphocyte (%)                      | Blood urea nitrogen (mg/dL)                         |
| 38 | Time interval                                      | Somatic symptom and related disorders              | Anxiety disorders                                    | Diastolic blood pressure (mmHg)                     |
| 39 | Dipeptidyl peptidase 4 inhibitors                  | Trauma- and stressor-related disorders             | White blood cell-segment (%)                         | White blood cell-eosinophil (%)                     |
| 40 | Aripiprazole                                       | Serum creatinine (mg/dL)                           | Angiotensin receptor blockers                        | Sex                                                 |
| 41 | Diabetes mellitus without end organ damage         | Other bleeding                                     | Depressive disorders                                 | Non-benzodiazepines                                 |
| 42 | Diuretics                                          | The -dones                                         | Liver diseases without sequelae                      | Diabetes mellitus without end organ damage          |
| 43 | The -dones                                         | Statins                                            | White blood cell-basophil (%)                        | Hematocrit (%)                                      |
| 44 | Acarbose                                           | Height (m)                                         | Trauma- and stressor-related disorders               | Sleep-wake disorders                                |
| 45 | Any cancer                                         | Red cell distribution width-standard deviation(fL) | Typical antipsychotics                               | Vascular dementia                                   |
| 46 | White blood cell-eosinophil (%)                    | White blood cell (count/uL)                        | Diabetes mellitus without end organ damage           | Antacids                                            |
| 47 | Neurodevelopmental disorders                       | Platelet (count/uL)                                | Dosing frequency                                     | Liver diseases without sequelae                     |
| 48 | Statins                                            | Dissociative disorders                             | Selective serotonin reuptake inhibitor               | Feeding and eating disorders                        |
| 49 | Angiotensin converting enzyme inhibitors           | Hematocrit (%)                                     | Mirtazapine                                          | Neurocognitive disorders (Except vascular dementia) |
| 50 | Other antiplatelet                                 | Hemopericardium or pericardial bleeding            | Gastrointestinal bleeding                            | Selective serotonin reuptake inhibitor              |
| 51 | Height (m)                                         | Intraabdominal bleeding                            | Neurocognitive disorders (Except vascular dementia)  | Carbamazepine                                       |
| 52 | Gastrointestinal bleeding                          | Congestive heart failure                           | Non-benzodiazepines                                  | Aripiprazole                                        |
| 53 | Hematoma or compartment syndrome                   | Mean corpuscular hemoglobin (pg)                   | Neurodevelopmental disorders                         | White blood cell-basophil (%)                       |
| 54 | Hemopericardium or pericardial bleeding            | Calcium channel blockers                           | Aripiprazole                                         | Ocular bleeding                                     |
| 55 | Intraabdominal bleeding                            | Antacids                                           | Schizophrenia spectrum and other psychotic disorders | Mean corpuscular volume (fL)                        |
| 56 | Intracranial bleeding                              | Peptic ulcer diseases                              | Bipolar and related disorders                        | Anxiety disorders                                   |
| 57 | Hyperlipidemia                                     | Hemiplegia                                         | Sex                                                  | Typical antipsychotics                              |
| 58 | Liver diseases with sequelae                       | Angiotensin converting enzyme inhibitors           | Vascular dementia                                    | Neurodevelopmental disorders                        |
| 59 | Hemiplegia                                         | Sulfonylureas                                      | Ocular bleeding                                      | Personality disorders                               |
| 60 | Diabetes mellitus with end organ damage            | Aspirin                                            | Obsessive-compulsive and related disorders           | Trauma- and stressor-related disorders              |
| 61 | Liver diseases without sequelae                    | Paraphilic disorders                               | Antacids                                             | Aspirin                                             |
| 62 | Peptic ulcer diseases                              | Metformin                                          | Agomelatine                                          | Bipolar and related disorders                       |
| 63 | Connective tissue diseases                         | Renal diseases                                     | Feeding and eating disorders                         | Calcium channel blockers                            |
| 64 | Chronic pulmonary diseases                         | Disruptive, impulse-control, and conduct disorders | Diuretics                                            | Cerebrovascular diseases                            |



|    |                                                      |                                                          |                                                    |                                                      |
|----|------------------------------------------------------|----------------------------------------------------------|----------------------------------------------------|------------------------------------------------------|
| 65 | Vascular dementia                                    | Ocular bleeding                                          | Sleep-wake disorders                               | Schizophrenia spectrum and other psychotic disorders |
| 66 | Cerebrovascular diseases                             | Mean corpuscular volume (fL)                             | Serotonin norepinephrine reuptake inhibitor        | Diuretics                                            |
| 67 | Peripheral vascular diseases                         | Elimination disorders                                    | Calcium channel blockers                           | Renal diseases                                       |
| 68 | Congestive heart failure                             | Red cell distribution width-coefficient of variation (%) | Carbamazepine                                      | Acetylcholinesterase inhibitors                      |
| 69 | Myocardial infarct                                   | Hematoma or compartment syndrome                         | Personality disorders                              | Liver diseases with sequelae                         |
| 70 | Paraphilic disorders                                 | Feeding and eating disorders                             | Trazodone                                          | Angiotensin converting enzyme inhibitors             |
| 71 | Gender dysphoria                                     | Connective tissue diseases                               | Disruptive, impulse-control, and conduct disorders | Sulfonylureas                                        |
| 72 | Feeding and eating disorders                         | Agomelatine                                              | Elimination disorders                              | Obsessive-compulsive and related disorders           |
| 73 | Dissociative disorders                               | White blood cell-lymphocyte (%)                          | Aspirin                                            | Any cancer                                           |
| 74 | Personality disorders                                | Gender dysphoria                                         | Fibrates                                           | Chronic pulmonary diseases                           |
| 75 | Sexual dysfunctions                                  | Metastatic solid tumor                                   | Chronic pulmonary diseases                         | Elimination disorders                                |
| 76 | Sleep-wake disorders                                 | Intracranial bleeding                                    | Lamotrigine                                        | The benzamides                                       |
| 77 | Bipolar and related disorders                        | Acarbose                                                 | Myocardial infarct                                 | Agomelatine                                          |
| 78 | Schizophrenia spectrum and other psychotic disorders | Meglitinides                                             | Insulins                                           | Diabetes mellitus with end organ damage              |
| 79 | Disruptive, impulse-control, and conduct disorders   | Typical antipsychotics                                   | Metformin                                          | Lamotrigine                                          |
| 80 | Antacids                                             | Sodium-glucose cotransporter 2 inhibitors                | Renal diseases                                     | Sexual dysfunctions                                  |
| 81 | Amiodarone                                           | Myocardial infarct                                       | Angiotensin converting enzyme inhibitors           | Hematoma or compartment syndrome                     |
| 82 | Aspirin                                              | Amiodarone                                               | Sulfonylureas                                      | Intracranial bleeding                                |
| 83 | Calcium channel blockers                             | Bupropion                                                | Cerebrovascular diseases                           | Hemiplegia                                           |
| 84 | Meglitinides                                         | Serotonin norepinephrine reuptake inhibitor              | The benzamides                                     | Acquired immune deficiency syndrome                  |
| 85 | Thiazolidinediones                                   | Carbamazepine                                            | Other bleeding                                     | Hemopericardium or pericardial bleeding              |
| 86 | Sodium-glucose cotransporter 2 inhibitors            | Hypertension                                             | Statins                                            | Gastrointestinal bleeding                            |
| 87 | Metformin                                            | Benzodiazepines                                          | Acetylcholinesterase inhibitors                    | Metastatic solid tumor                               |
| 88 | Insulins                                             | Aspartate aminotransferase (U/L)                         | Acarbose                                           | Peptic ulcer diseases                                |
| 89 | Non-benzodiazepines                                  | Diuretics                                                | Liver diseases with sequelae                       | Connective tissue diseases                           |
| 90 | Benzodiazepines                                      | Thiazolidinediones                                       | Any cancer                                         | Intraabdominal bleeding                              |
| 91 | Typical antipsychotics                               | Sexual dysfunctions                                      | Bupropion                                          | Thiazolidinediones                                   |
| 92 | Bupropion                                            | Red blood cell (count/uL)                                | Acquired immune deficiency syndrome                | Peripheral vascular diseases                         |
| 93 | Mirtazapine                                          | Lamotrigine                                              | Diabetes mellitus with end organ damage            | Dipeptidyl peptidase 4 inhibitors                    |
| 94 | Serotonin norepinephrine reuptake inhibitor          | Any cancer                                               | Metastatic solid tumor                             | Serotonin norepinephrine reuptake inhibitor          |
| 95 | Selective serotonin reuptake inhibitor               | Angiotensin receptor blockers                            | Other antiplatelet                                 | Trazodone                                            |
| 96 | Lamotrigine                                          | Insulins                                                 | Somatic symptom and related disorders              | Mirtazapine                                          |
| 97 | Carbamazepine                                        | White blood cell-segment (%)                             | Dipeptidyl peptidase 4 inhibitors                  | Bupropion                                            |
| 98 | Alanine aminotransferase (U/L)                       | Fibrates                                                 | Intracranial bleeding                              | Statins                                              |



|     |                                                          |                                                      |                                           |                                                    |
|-----|----------------------------------------------------------|------------------------------------------------------|-------------------------------------------|----------------------------------------------------|
| 99  | Aspartate aminotransferase (U/L)                         | Alanine aminotransferase (U/L)                       | Hematoma or compartment syndrome          | Fibrates                                           |
| 100 | Blood urea nitrogen (mg/dL)                              | Sodium (mg/dL)                                       | Dissociative disorders                    | Insulins                                           |
| 101 | White blood cell-monocyte (%)                            | Other antiplatelet                                   | Hemiplegia                                | Metformin                                          |
| 102 | White blood cell-lymphocyte (%)                          | Peripheral vascular diseases                         | Connective tissue diseases                | Sodium-glucose cotransporter 2 inhibitors          |
| 103 | White blood cell-segment (%)                             | Mean corpuscular hemoglobin concentration (gHb/dL)   | Gender dysphoria                          | Acarbose                                           |
| 104 | Red cell distribution width-coefficient of variation (%) | Mirtazapine                                          | Meglitinides                              | Congestive heart failure                           |
| 105 | Platelet (count/uL)                                      | Topiramate                                           | Peptic ulcer diseases                     | Meglitinides                                       |
| 106 | Mean corpuscular hemoglobin (pg)                         | Trazodone                                            | Sodium-glucose cotransporter 2 inhibitors | Other antiplatelet                                 |
| 107 | Mean corpuscular volume (fL)                             | White blood cell-monocyte (%)                        | Amiodarone                                | Amiodarone                                         |
| 108 | Hematocrit (%)                                           | Personality disorders                                | Peripheral vascular diseases              | Disruptive, impulse-control, and conduct disorders |
| 109 | Hemoglobin (g/dL)                                        | Acetylcholinesterase inhibitors                      | Congestive heart failure                  | Somatic symptom and related disorders              |
| 110 | Red blood cell (count/uL)                                | Bipolar and related disorders                        | Intraabdominal bleeding                   | Dissociative disorders                             |
| 111 | White blood cell (count/uL)                              | Time interval                                        | Hemopericardium or pericardial bleeding   | Gender dysphoria                                   |
| 112 | Diastolic blood pressure (mmHg)                          | Anxiety disorders                                    | Sexual dysfunctions                       | Paraphilic disorders                               |
| 113 | Dosing frequency                                         | Weight (Kg)                                          | Paraphilic disorders                      | Myocardial infarct                                 |
| 114 | Sex                                                      | Schizophrenia spectrum and other psychotic disorders | Thiazolidinediones                        | Other bleeding                                     |



**Appendix 16 (Supplementary Table S8).** Detail information of binary outcomes of logistic regression algorithm under different feature combinations

| Model<br>(LogR) | TP               | TN            | FP            | FN            | TPR<br>(Sensitivity)   | TNR<br>(Specificity)   | PPV<br>(Precision)     | NPV                    | AUC-ROC                | F-score                | Accuracy               |
|-----------------|------------------|---------------|---------------|---------------|------------------------|------------------------|------------------------|------------------------|------------------------|------------------------|------------------------|
| <b>Model P</b>  | 118<br>(112-124) | 31<br>(25-36) | 40<br>(35-46) | 15<br>(9-21)  | 0.886<br>(0.839-0.932) | 0.431<br>(0.356-0.506) | 0.745<br>(0.726-0.764) | 0.675<br>(0.600-0.750) | 0.748<br>(0.732-0.764) | 0.809<br>(0.792-0.826) | 0.727<br>(0.707-0.748) |
| <b>Model 1</b>  | 125<br>(124-127) | 21<br>(18-23) | 50<br>(48-53) | 8<br>(6-9)    | 0.941<br>(0.929-0.954) | 0.290<br>(0.252-0.328) | 0.713<br>(0.701-0.725) | 0.725<br>(0.677-0.774) | 0.753<br>(0.741-0.766) | 0.811<br>(0.801-0.822) | 0.715<br>(0.698-0.731) |
| <b>Model 2</b>  | 116<br>(113-119) | 28<br>(24-32) | 43<br>(39-47) | 17<br>(14-20) | 0.874<br>(0.852-0.895) | 0.400<br>(0.343-0.457) | 0.732<br>(0.715-0.749) | 0.628<br>(0.588-0.669) | 0.734<br>(0.721-0.747) | 0.796<br>(0.785-0.808) | 0.709<br>(0.691-0.726) |
| <b>Model 3</b>  | 121<br>(120-123) | 27<br>(26-28) | 44<br>(43-45) | 12<br>(10-13) | 0.913<br>(0.899-0.927) | 0.380<br>(0.363-0.398) | 0.734<br>(0.726-0.742) | 0.700<br>(0.659-0.741) | 0.761<br>(0.751-0.771) | 0.814<br>(0.804-0.824) | 0.727<br>(0.713-0.741) |

Abbreviations: AUC-ROC, area under the curve of receiver operator characteristic; FN, false negative; FP, false positive; LogR, Logistic regression; NPV, negative predictive value; PPV, positive predictive value; TN, true negative; TP, true positive; TNR, true negative rate; TPR, true positive rate.

Model P = primary model using all features; Model 1 = model using basic information as features; Model 2 = model using basic information and concomitant psychotropic medications as features; Model 3 = model using the top 10 features of different algorithms as features.



**Appendix 17 (Supplementary Table S9).** Detail information of binary outcomes of support vector machine algorithm under different feature combinations

| <b>Model (SVM)</b> | <b>TP</b>        | <b>TN</b>     | <b>FP</b>     | <b>FN</b>     | <b>TPR (Sensitivity)</b> | <b>TNR (Specificity)</b> | <b>PPV (Precision)</b> | <b>NPV</b>             | <b>AUC-ROC</b>         | <b>F-score</b>         | <b>Accuracy</b>        |
|--------------------|------------------|---------------|---------------|---------------|--------------------------|--------------------------|------------------------|------------------------|------------------------|------------------------|------------------------|
| <b>Model P</b>     | 125<br>(121-129) | 23<br>(17-29) | 48<br>(42-54) | 8<br>(4-12)   | 0.940<br>(0.911-0.969)   | 0.324<br>(0.241-0.407)   | 0.723<br>(0.702-0.744) | 0.747<br>(0.675-0.819) | 0.759<br>(0.744-0.774) | 0.817<br>(0.806-0.828) | 0.725<br>(0.706-0.745) |
| <b>Model 1</b>     | 123<br>(120-126) | 21<br>(17-24) | 50<br>(47-54) | 10<br>(7-13)  | 0.925<br>(0.901-0.949)   | 0.290<br>(0.238-0.342)   | 0.709<br>(0.690-0.728) | 0.673<br>(0.576-0.770) | 0.766<br>(0.747-0.786) | 0.803<br>(0.783-0.823) | 0.704<br>(0.673-0.735) |
| <b>Model 2</b>     | 120<br>(119-122) | 26<br>(21-32) | 45<br>(39-50) | 13<br>(11-14) | 0.904<br>(0.894-0.914)   | 0.369<br>(0.293-0.445)   | 0.729<br>(0.706-0.752) | 0.669<br>(0.625-0.714) | 0.775<br>(0.754-0.797) | 0.807<br>(0.793-0.821) | 0.718<br>(0.693-0.743) |
| <b>Model 3</b>     | 121<br>(119-122) | 28<br>(23-32) | 43<br>(39-48) | 12<br>(11-14) | 0.908<br>(0.896-0.920)   | 0.392<br>(0.327-0.456)   | 0.737<br>(0.718-0.756) | 0.694<br>(0.671-0.717) | 0.771<br>(0.762-0.779) | 0.814<br>(0.805-0.823) | 0.728<br>(0.711-0.746) |

Abbreviations: AUC-ROC, area under the curve of receiver operator characteristic; FN, false negative; FP, false positive; NPV, negative predictive value; PPV, positive predictive value; SVM, support vector machine; TN, true negative; TP, true positive; TNR, true negative rate; TPR, true positive rate.

Model P = primary model using all features; Model 1 = model using basic information as features; Model 2 = model using basic information and concomitant psychotropic medications as features; Model 3 = model using the top 10 features of different algorithms as features.



**Appendix 18 (Supplementary Table S10).** Detail information of binary outcomes of random forests algorithm under different feature combinations

| Model<br>(RF)  | TP               | TN            | FP            | FN            | TPR<br>(Sensitivity)   | TNR<br>(Specificity)   | PPV<br>(Precision)     | NPV                    | AUC-ROC                | F-score                | Accuracy               |
|----------------|------------------|---------------|---------------|---------------|------------------------|------------------------|------------------------|------------------------|------------------------|------------------------|------------------------|
| <b>Model P</b> | 127<br>(126-129) | 16<br>(10-22) | 55<br>(49-61) | 6<br>(4-7)    | 0.958<br>(0.947-0.969) | 0.220<br>(0.134-0.305) | 0.697<br>(0.676-0.719) | 0.728<br>(0.659-0.797) | 0.784<br>(0.754-0.814) | 0.807<br>(0.794-0.820) | 0.701<br>(0.675-0.727) |
| <b>Model 1</b> | 122<br>(120-125) | 24<br>(20-28) | 47<br>(43-51) | 11<br>(8-13)  | 0.920<br>(0.901-0.940) | 0.341<br>(0.286-0.395) | 0.723<br>(0.703-0.744) | 0.694<br>(0.613-0.775) | 0.767<br>(0.759-0.775) | 0.810<br>(0.790-0.830) | 0.719<br>(0.688-0.749) |
| <b>Model 2</b> | 125<br>(124-127) | 21<br>(17-25) | 50<br>(46-54) | 8<br>(6-9)    | 0.941<br>(0.929-0.954) | 0.299<br>(0.244-0.353) | 0.716<br>(0.701-0.731) | 0.731<br>(0.688-0.773) | 0.796<br>(0.786-0.806) | 0.813<br>(0.803-0.823) | 0.718<br>(0.700-0.735) |
| <b>Model 3</b> | 119<br>(116-123) | 26<br>(21-31) | 45<br>(40-50) | 14<br>(10-17) | 0.896<br>(0.871-0.921) | 0.369<br>(0.298-0.440) | 0.727<br>(0.706-0.749) | 0.655<br>(0.598-0.712) | 0.785<br>(0.777-0.792) | 0.803<br>(0.786-0.819) | 0.713<br>(0.687-0.739) |

Abbreviations: AUC-ROC, area under the curve of receiver operator characteristic; FN, false negative; FP, false positive; NPV, negative predictive value; PPV, positive predictive value; RF, random forests; TN, true negative; TP, true positive; TNR, true negative rate; TPR, true positive rate.

Model P = primary model using all features; Model 1 = model using basic information as features; Model 2 = model using basic information and concomitant psychotropic medications as features; Model 3 = model using the top 10 features of different algorithms as features.



**Appendix 19 (Supplementary Table S11).** Detail information of binary outcomes of extreme gradient boosting algorithm under different feature combinations

| <b>Model<br/>(XGBoost)</b> | <b>TP</b>        | <b>TN</b>     | <b>FP</b>     | <b>FN</b>     | <b>TPR<br/>(Sensitivity)</b> | <b>TNR<br/>(Specificity)</b> | <b>PPV<br/>(Precision)</b> | <b>NPV</b>             | <b>AUC-ROC</b>         | <b>F-score</b>         | <b>Accuracy</b>        |
|----------------------------|------------------|---------------|---------------|---------------|------------------------------|------------------------------|----------------------------|------------------------|------------------------|------------------------|------------------------|
| <b>Model P</b>             | 120<br>(116-125) | 27<br>(24-29) | 44<br>(42-47) | 13<br>(8-17)  | 0.904<br>(0.870-0.938)       | 0.377<br>(0.344-0.411)       | 0.731<br>(0.721-0.741)     | 0.681<br>(0.607-0.756) | 0.775<br>(0.741-0.810) | 0.808<br>(0.792-0.825) | 0.721<br>(0.700-0.741) |
| <b>Model 1</b>             | 120<br>(118-121) | 25<br>(22-28) | 46<br>(43-49) | 13<br>(12-15) | 0.899<br>(0.887-0.912)       | 0.346<br>(0.304-0.389)       | 0.721<br>(0.706-0.735)     | 0.647<br>(0.601-0.693) | 0.756<br>(0.732-0.780) | 0.800<br>(0.788-0.812) | 0.707<br>(0.688-0.726) |
| <b>Model 2</b>             | 122<br>(118-126) | 27<br>(23-31) | 44<br>(40-48) | 11<br>(7-15)  | 0.916<br>(0.887-0.944)       | 0.383<br>(0.326-0.440)       | 0.736<br>(0.716-0.755)     | 0.710<br>(0.629-0.791) | 0.778<br>(0.750-0.806) | 0.816<br>(0.797-0.835) | 0.730<br>(0.702-0.759) |
| <b>Model 3</b>             | 116<br>(113-120) | 31<br>(28-34) | 40<br>(37-43) | 17<br>(13-20) | 0.875<br>(0.852-0.899)       | 0.434<br>(0.389-0.479)       | 0.743<br>(0.731-0.756)     | 0.651<br>(0.616-0.685) | 0.766<br>(0.748-0.785) | 0.804<br>(0.793-0.815) | 0.722<br>(0.707-0.736) |

Abbreviations: AUC-ROC, area under the curve of receiver operator characteristic; FN, false negative; FP, false positive; NPV, negative predictive value; PPV, positive predictive value; TN, true negative; TP, true positive; TNR, true negative rate; TPR, true positive rate; XGBoost, extreme gradient boosting. Model P = primary model using all features; Model 1 = model using basic information as features; Model 2 = model using basic information and concomitant psychotropic medications as features; Model 3 = model using the top 10 features of different algorithms as features.



**Appendix 20 (Supplementary Table S12).** Detail information of continuous outcomes of linear regression algorithm under different feature combinations

| <b>Model (LinR)</b> | <b>MAE</b>          | <b>MSE</b>          | <b>RMSE</b>         | <b>R<sup>2</sup></b> | <b>Accuracy</b>     |
|---------------------|---------------------|---------------------|---------------------|----------------------|---------------------|
| <b>Model P</b>      | 0.159 (0.156-0.162) | 0.038 (0.037-0.040) | 0.196 (0.193-0.199) | 0.209 (0.187-0.231)  | 0.690 (0.677-0.703) |
| <b>Model 1</b>      | 0.159 (0.158-0.160) | 0.039 (0.039-0.039) | 0.197 (0.196-0.198) | 0.199 (0.192-0.207)  | 0.670 (0.654-0.685) |
| <b>Model 2</b>      | 0.157 (0.155-0.159) | 0.039 (0.038-0.039) | 0.196 (0.195-0.198) | 0.207 (0.197-0.217)  | 0.670 (0.658-0.681) |
| <b>Model 3</b>      | 0.157 (0.155-0.159) | 0.038 (0.038-0.039) | 0.196 (0.194-0.197) | 0.211 (0.200-0.223)  | 0.691 (0.676-0.706) |

Abbreviations: LinR, linear regression; MAE, mean absolute error; MSE, mean-square error; RMSE, root-mean-square error.

Model P = primary model using all features; Model 1 = model using basic information as features; Model 2 = model using basic information and concomitant psychotropic medications as features; Model 3 = model using the top 10 features of different algorithms as features.



**Appendix 21 (Supplementary Table S13).** Detail information of continuous outcomes of support vector machine algorithm under different feature combinations

| <b>Model (SVM)</b> | <b>MAE</b>          | <b>MSE</b>          | <b>RMSE</b>         | <b>R<sup>2</sup></b> | <b>Accuracy</b>     |
|--------------------|---------------------|---------------------|---------------------|----------------------|---------------------|
| <b>Model P</b>     | 0.140 (0.134-0.145) | 0.031 (0.028-0.033) | 0.175 (0.167-0.183) | 0.370 (0.312-0.427)  | 0.751 (0.710-0.792) |
| <b>Model 1</b>     | 0.150 (0.147-0.152) | 0.036 (0.034-0.037) | 0.189 (0.186-0.192) | 0.266 (0.241-0.291)  | 0.716 (0.705-0.726) |
| <b>Model 2</b>     | 0.145 (0.139-0.150) | 0.032 (0.031-0.034) | 0.180 (0.175-0.185) | 0.333 (0.294-0.372)  | 0.735 (0.713-0.758) |
| <b>Model 3</b>     | 0.160 (0.158-0.161) | 0.040 (0.038-0.041) | 0.200 (0.196-0.203) | 0.179 (0.149-0.208)  | 0.690 (0.674-0.706) |

Abbreviations: MAE, mean absolute error; MSE, mean-square error; RMSE, root-mean-square error; SVM, support vector machine.

Model P = primary model using all features; Model 1 = model using basic information as features; Model 2 = model using basic information and concomitant psychotropic medications as features; Model 3 = model using the top 10 features of different algorithms as features.



**Appendix 22 (Supplementary Table S14).** Detail information of continuous outcomes of random forests algorithm under different feature combinations

| <b>Model (RF)</b> | <b>MAE</b>          | <b>MSE</b>          | <b>RMSE</b>         | <b>R<sup>2</sup></b> | <b>Accuracy</b>     |
|-------------------|---------------------|---------------------|---------------------|----------------------|---------------------|
| <b>Model P</b>    | 0.152 (0.147-0.156) | 0.035 (0.034-0.037) | 0.188 (0.184-0.192) | 0.273 (0.245-0.301)  | 0.680 (0.665-0.696) |
| <b>Model 1</b>    | 0.154 (0.153-0.155) | 0.037 (0.036-0.037) | 0.191 (0.190-0.193) | 0.246 (0.237-0.255)  | 0.696 (0.681-0.711) |
| <b>Model 2</b>    | 0.150 (0.146-0.155) | 0.035 (0.033-0.036) | 0.186 (0.182-0.190) | 0.287 (0.259-0.315)  | 0.681 (0.660-0.703) |
| <b>Model 3</b>    | 0.155 (0.153-0.158) | 0.038 (0.037-0.039) | 0.194 (0.192-0.197) | 0.222 (0.203-0.242)  | 0.687 (0.665-0.710) |

Abbreviations: MAE, mean absolute error; MSE, mean-square error; RF, random forests; RMSE, root-mean-square error.

Model P = primary model using all features; Model 1 = model using basic information as features; Model 2 = model using basic information and concomitant psychotropic medications as features; Model 3 = model using the top 10 features of different algorithms as features.



**Appendix 23 (Supplementary Table S15).** Detail information of continuous outcomes of extreme gradient boosting algorithm under different feature combinations

| <b>Model (XGBoost)</b> | <b>MAE</b>          | <b>MSE</b>          | <b>RMSE</b>         | <b>R<sup>2</sup></b> | <b>Accuracy</b>     |
|------------------------|---------------------|---------------------|---------------------|----------------------|---------------------|
| <b>Model P</b>         | 0.155 (0.150-0.159) | 0.037 (0.036-0.039) | 0.193 (0.189-0.196) | 0.236 (0.206-0.266)  | 0.683 (0.671-0.695) |
| <b>Model 1</b>         | 0.155 (0.154-0.157) | 0.038 (0.037-0.038) | 0.195 (0.194-0.196) | 0.220 (0.212-0.229)  | 0.683 (0.664-0.702) |
| <b>Model 2</b>         | 0.153 (0.149-0.158) | 0.037 (0.035-0.038) | 0.192 (0.188-0.195) | 0.245 (0.215-0.274)  | 0.689 (0.660-0.718) |
| <b>Model 3</b>         | 0.159 (0.158-0.161) | 0.039 (0.039-0.040) | 0.198 (0.197-0.200) | 0.191 (0.178-0.204)  | 0.679 (0.670-0.689) |

Abbreviations: MAE, mean absolute error; MSE, mean-square error; RMSE, root-mean-square error; XGBoost, extreme gradient boosting.

Model P = primary model using all features; Model 1 = model using basic information as features; Model 2 = model using basic information and concomitant psychotropic medications as features; Model 3 = model using the top 10 features of different algorithms as features.



**Appendix 24 (Supplementary Figure S9).** Comparison of accuracy performance between the primary model and different new models under different algorithms.

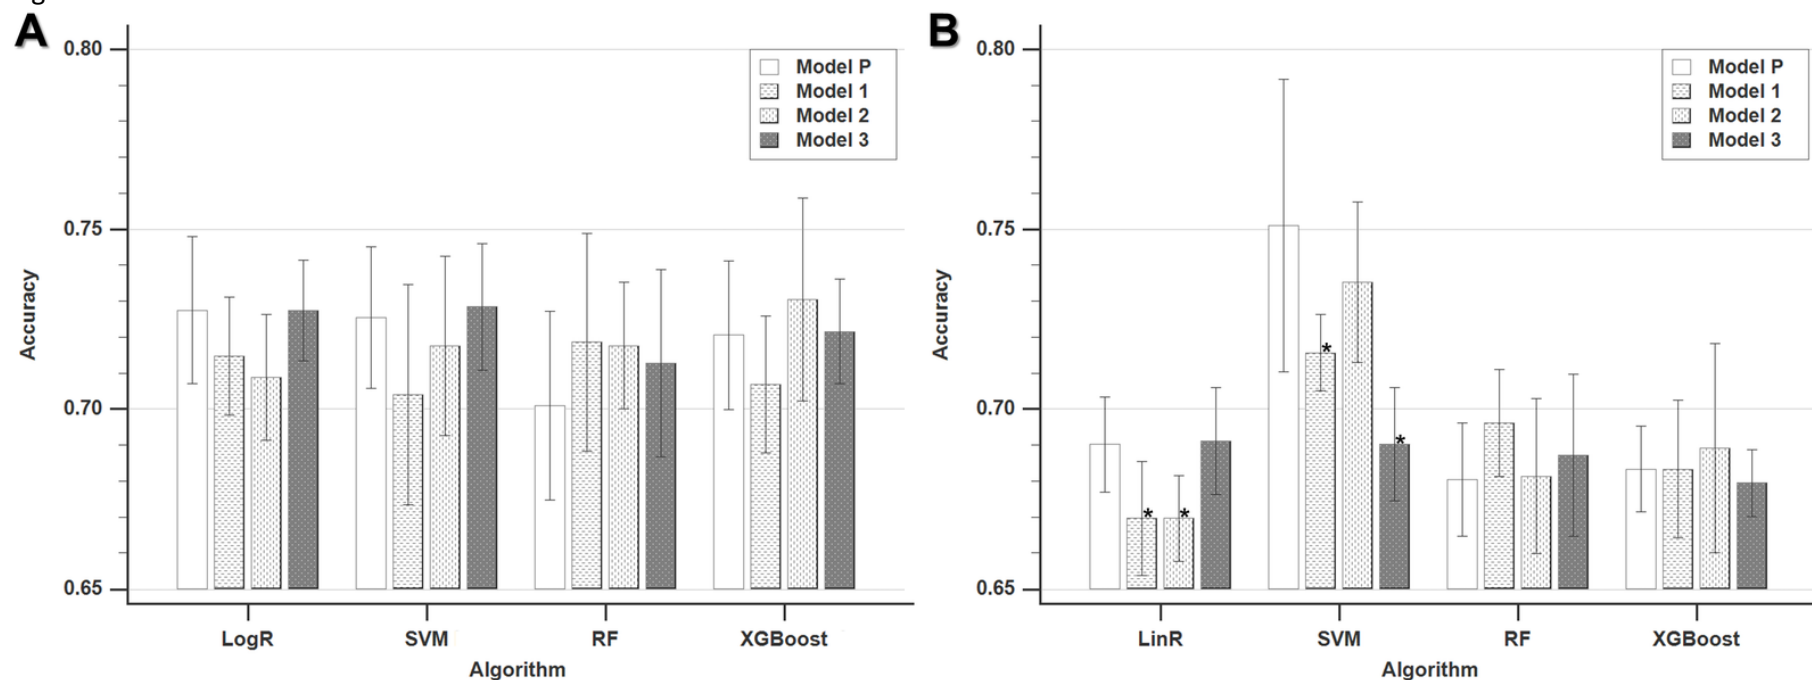

(A) binary prediction, (B) continuous prediction. LinR = linear regression; LogR = logistic regression; Model P = primary model using all features; Model 1 = model using basic in-formation as features; Model 2 = model using basic information and concomitant psychotropic medications as features; Model 3 = model using the top 10 features of different algorithms as features; RF = random forests; SVM = support vector machine; XGBoost = extreme gradient boosting.
